# Supplementary material for: Crystal-packing modes determine the solid-state ESIPT fluorescence in highly dipolar 2′-hydroxychalcones
Source: Royal Society of Chemistry journal article supplement (doi:10.1039/d1tc03096e), 2021-01-01
Supplement: d1tc03096e1.pdf [file d1tc03096e1.pdf]

# Crystal-packing modes determine solid-state ESIPT fluorescence in highly dipolar 2'-hydroxychalcones.

*Alix Tordo<sup>†</sup>, Erwann Jeanneau<sup>‡</sup>, Mathieu Bordy<sup>†</sup>, Yann Bretonnière<sup>†</sup>, Jens Hasserodt<sup>†\*</sup>.*

<sup>†</sup>Univ. Lyon, ENS Lyon, CNRS, Université Lyon 1, Laboratoire de Chimie, UMR 5182, 46 Allée  
d'Italie, 69364 Lyon, France.

<sup>‡</sup> Univ. Lyon 1, Centre de Diffractométrie Henri Longchambon, 5 rue de la Doua, 69100  
Villeurbanne, France.

[jens.hasserodt@ens-lyon.fr](mailto:jens.hasserodt@ens-lyon.fr)

## Table of Contents

### 1. Organic synthesis

- a. General
- b. Synthesis of **1a-e, 2a-e, 3a-e**

### 2. Spectroscopy

- a. General
- b. Crystal-state fluorescence emission spectra of **1a-e, 2a-e, 3a-e**

### 3. Single-crystal X-ray crystallography

- a. General
- b. Intramolecular parameters
- c. Data for compounds **1a-e, 2a-e, 3a-e**
- d. Additional data for compound **2a, 2b, 2e, 2c, 2d, 3e**

### 4. NMR Spectra

### 5. References

## 1. Organic synthesis

### a. General

Unless otherwise stated, all reagents and solvents were purchased from commercial suppliers and used without further purification. Column chromatography was performed using Merck silica gel Si-60 (40-63  $\mu\text{m}$ ). All mixed solvent eluents are reported as v/v solutions.  $^1\text{H}$  and  $^{13}\text{C}$  Nuclear Magnetic Resonance (NMR) spectra were acquired at 297 K on a Bruker AVANCE 400 (400 MHz and 100 MHz for  $^1\text{H}$  and  $^{13}\text{C}$ , respectively) as indicated. Data are reported as follows: chemical shift (reported in ppm and referenced to solvent peaks as internal standards), multiplicity (s = singlet, br s = broad singlet, d = doublet, t = triplet, q = quadruplet, m = multiplet, dd = doublet of doublets, etc.), NMR coupling constants J (reported in Hertz and referring to (H, H) coupling), integration.

### b. Synthesis of intermediates 4 and 5, and of 2'-hydroxychalcones 1a-e, 2a-e, 3a-e.

#### Synthesis of 4-(azetidin-1-yl)benzaldehyde (4)

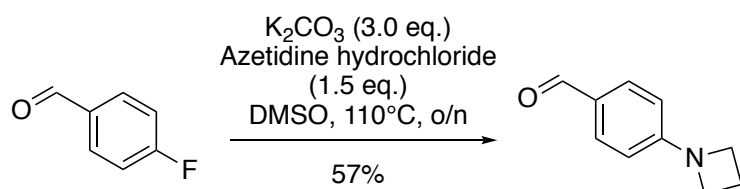

To a solution of 4-fluorobenzaldehyde (2.0 mL, 19 mmol, 1.0 eq.) in DMSO (40 mL) was added anhydrous  $\text{K}_2\text{CO}_3$  (7.9 g, 57 mmol, 3.0 eq.) followed by the addition of azetidine hydrochloride (2.63 g, 27 mmol, 1.5 eq.) with stirring at 110 °C overnight. The mixture was then cooled to room temperature, diluted with water (200 mL), and extracted with ethyl acetate (3  $\times$  100 mL). The organic layer was washed with brine (50 mL) and dried over  $\text{Na}_2\text{SO}_4$ , then concentrated *in vacuo*. The product was then purified by flash column chromatography (20 % EtOAc/hexanes) affording **4** as a pale yellow solid (1.76 g, 11 mmol, 57 %).  $^1\text{H}$  NMR (400 MHz, Chloroform-*d*)  $\delta$  9.71 (s, 1H), 7.69 (d,  $J$  = 8.3 Hz, 2H), 6.36 (d,  $J$  = 8.3 Hz, 2H), 4.01 (t,  $J$  = 7.4 Hz, 4H), 2.42 (p,  $J$  = 7.4 Hz, 2H).  $^{13}\text{C}$  NMR (101 MHz,  $\text{CDCl}_3$ )  $\delta$  190.4, 155.2, 132.0, 125.8, 109.8, 51.5, 16.52.

### Synthesis of 4-(1-pyrrolidinyl)benzaldehyde (**5**)

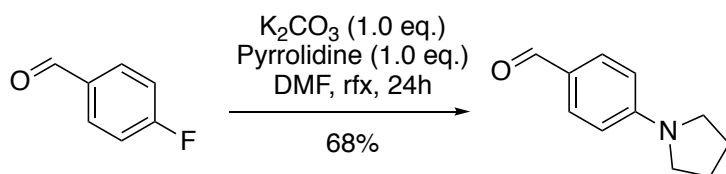

4-Fluoro benzaldehyde (4.07 mL, 38.0 mmol, 1.0 eq.), pyrrolidine (3.17 mL, 38.0 mmol, 1.0 eq.), and  $K_2CO_3$  (5.25 g, 38.0 mmol, 1.0 eq.) were refluxed in DMF (40 mL) for 24 h. After completion of the reaction, the mixture was poured into ice-water (50 mL). The precipitated product was filtered, washed with water, dried, and recrystallized from EtOH to give a beige powder (4.52 g, 25.8 mmol, 68%).  $^1H$  NMR (400 MHz, Chloroform-*d*)  $\delta$  9.72 (s, 1H), 7.73 (d,  $J = 8.6$  Hz, 2H), 6.57 (d,  $J = 8.3$  Hz, 2H), 3.39 (q,  $J = 4.9, 3.1$  Hz, 4H), 2.05 (p,  $J = 3.4$  Hz, 4H).  $^{13}C$  NMR (101 MHz,  $CDCl_3$ )  $\delta$  190.4, 152.1, 132.3, 125.0, 111.3, 47.8, 25.6.

### General protocol A for the synthesis of 2'-hydroxychalcone derivatives (**1a-e**, **2a-e**, **3a-e**):

To a solution of methylketone (1.0 eq.) in EtOH was added the benzaldehyde (1.0 eq) and pyrrolidine (1.0 eq). The resulting mixture was stirred at room temperature overnight (16h). The precipitated solid was filtered and washed with cold EtOH and PE to obtain the desired condensed product.

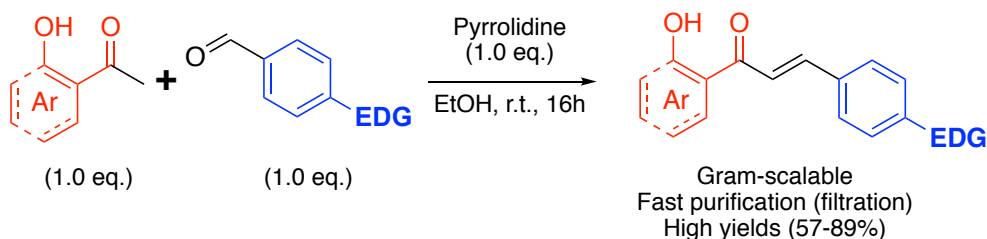

**1a-** According to general procedure **A** and using 2'-hydroxyacetophenone (602  $\mu$ L, 5.00 mmol, 1.0 eq.), dimethylaminobenzaldehyde (748 mg, 5.00 mmol, 1.0 eq.) and pyrrolidine (441  $\mu$ L, 5.00 mmol, 1.0 eq.) in EtOH (15 mL), the fluorophore **1a** (1176 mg, 4.40 mmol, 88 %) was obtained as a red powder.  $^1H$  NMR (400 MHz, Chloroform-*d*)  $\delta$  7.99 – 7.85 (m, 2H), 7.58 (d,  $J = 8.5$  Hz, 2H), 7.52 – 7.38 (m, 2H), 7.01 (dd,  $J = 8.4, 1.4$  Hz, 1H), 6.98 – 6.86 (m, 1H), 6.70 (d,  $J = 8.5$  Hz, 2H), 3.06 (d,  $J = 1.2$  Hz, 6H).  $^{13}C$  NMR (101 MHz,  $CDCl_3$ )  $\delta$  193.6, 163.6, 152.5, 146.7, 135.8, 131.0, 129.5, 122.5, 120.5, 118.7, 114.4, 111.9, 40.2.

**1b** - According to general procedure **A** and using 2'-hydroxyacetophenone (602  $\mu\text{L}$ , 5.00 mmol, 1.0 eq.), diethylaminobenzaldehyde (886 mg, 5.00 mmol, 1.0 eq.) and pyrrolidine (441  $\mu\text{L}$ , 5.00 mmol, 1.0 eq.) in EtOH (15 mL), the fluorophore **1b** (1.24 g, 4.18 mmol, 84 %) was obtained as a red powder.  $^1\text{H}$  NMR (400 MHz, Chloroform-*d*)  $\delta$  7.99 – 7.85 (m, 2H), 7.61 – 7.51 (m, 2H), 7.50 – 7.39 (m, 2H), 7.01 (dd,  $J$  = 8.4, 1.2 Hz, 1H), 6.92 (ddd,  $J$  = 8.2, 7.2, 1.2 Hz, 1H), 6.72 – 6.62 (m, 2H), 3.43 (q,  $J$  = 7.1 Hz, 4H), 1.22 (t,  $J$  = 7.1 Hz, 6H).  $^{13}\text{C}$  NMR (101 MHz,  $\text{CDCl}_3$ )  $\delta$  193.6, 163.6, 150.2, 146.8, 135.7, 131.4, 129.5, 121.8, 120.6, 118.7, 113.8, 111.5, 44.7, 12.8.

**1c** - According to general procedure **A** and using 2'-hydroxyacetophenone (120  $\mu\text{L}$ , 1.00 mmol, 1.0 eq.), 4-(azetidin-1-yl)benzaldehyde **1** (161 mg, 1.00 mmol, 1.0 eq.) and pyrrolidine (88  $\mu\text{L}$ , 1.00 mmol, 1.0 eq.) in EtOH (3 mL), fluorophore **1c** (158 mg, 0.57 mmol, 57 %) was obtained as a red powder.  $^1\text{H}$  NMR (400 MHz, Chloroform-*d*)  $\delta$  8.05 – 7.78 (m, 2H), 7.54 (d,  $J$  = 8.5 Hz, 2H), 7.50 – 7.40 (m, 2H), 7.01 (d,  $J$  = 8.4 Hz, 1H), 6.92 (t,  $J$  = 7.6 Hz, 1H), 6.40 (d,  $J$  = 8.2 Hz, 2H), 4.00 (t,  $J$  = 7.2 Hz, 4H), 2.43 (p,  $J$  = 7.3 Hz, 2H).  $^{13}\text{C}$  NMR (101 MHz,  $\text{CDCl}_3$ )  $\delta$  193.7, 163.6, 153.6, 146.8, 135.8, 130.8, 129.5, 123.2, 120.5, 118.7, 114.6, 110.8, 51.9, 16.7.

**1d** - According to general procedure **A** and using 2'-hydroxyacetophenone (120  $\mu\text{L}$ , 1.00 mmol, 1.0 eq.), 4-(1-pyrrolidinyl)benzaldehyde **2** (175 mg, 1.00 mmol, 1.0 eq.) and pyrrolidine (88  $\mu\text{L}$ , 1.00 mmol, 1.0 eq.) in EtOH (3 mL), fluorophore **1d** (249 mg, 0.85 mmol, 85 %) was obtained as a red powder.  $^1\text{H}$  NMR (400 MHz, Chloroform-*d*)  $\delta$  7.99 – 7.88 (m, 2H), 7.57 (dd,  $J$  = 9.2, 2.4 Hz, 2H), 7.50 – 7.40 (m, 2H), 7.01 (dd,  $J$  = 8.4, 1.1 Hz, 1H), 6.97 – 6.88 (m, 1H), 6.63 – 6.51 (m, 2H), 3.50 – 3.24 (m, 4H), 2.15 – 1.93 (m,  $J$  = 6.2, 5.4 Hz, 4H).  $^{13}\text{C}$  NMR (101 MHz,  $\text{CDCl}_3$ )  $\delta$  193.6, 163.6, 150.1, 147.0, 135.7, 131.2, 129.5, 122.0, 120.6, 118.7, 113.7, 112.0, 47.8.

**1e** - According to general procedure **A** and using 2'-hydroxyacetophenone (120  $\mu\text{L}$ , 1.00 mmol, 1.0 eq.), 4-methoxybenzaldehyde (121  $\mu\text{L}$ , 1.00 mmol, 1.0 eq.) and pyrrolidine (88  $\mu\text{L}$ , 1.00 mmol, 1.0 eq.) in EtOH (3 mL), the fluorophore **1e** (159 mg, 0.63 mmol, 63 %) was obtained as a yellow powder.  $^1\text{H}$  NMR (400 MHz, Chloroform-*d*)  $\delta$  7.97 – 7.87 (m, 2H), 7.68 – 7.59 (m, 2H), 7.55 (d,  $J$  = 15.4 Hz, 1H), 7.49 (ddd,  $J$  = 8.6, 7.1, 1.6 Hz, 1H), 7.03 (dd,  $J$  = 8.4, 1.1 Hz, 1H), 6.99 – 6.90 (m, 3H), 3.87 (s, 3H).  $^{13}\text{C}$  NMR (101 MHz,  $\text{CDCl}_3$ )  $\delta$  193.8, 163.7, 162.2, 145.5, 136.3, 130.7, 129.7, 127.5, 120.3, 118.9, 118.75, 117.8, 114.7, 55.6.

**2a** - According to general procedure **A** and using 1'-hydroxy-2'-acetonaphthone (136 mg, 1.00 mmol, 1.0 eq.), dimethylaminobenzaldehyde (149 mg, 1.00 mmol, 1.0 eq.) and pyrrolidine (88  $\mu\text{L}$ , 1.00 mmol, 1.0 eq.) in EtOH (3

mL), fluorophore **3a** (273 mg, 0.86 mmol, 86 %) was obtained as an orange powder. <sup>1</sup>H NMR (400 MHz, Chloroform-*d*) δ 8.56 – 8.46 (m, 1H), 7.98 (d, *J* = 15.1 Hz, 2H), 7.86 (d, *J* = 8.9 Hz, 1H), 7.82 – 7.72 (m, 1H), 7.67 – 7.46 (m, 4H), 7.29 (d, *J* = 8.9 Hz, 1H), 6.81 – 6.58 (m, 2H), 3.05 (s, 6H). <sup>13</sup>C NMR (101 MHz, CDCl<sub>3</sub>) δ 193.2, 164.2, 152.4, 146.3, 137.3, 131.0, 129.9, 127.5, 125.8, 124.5, 124.2, 122.7, 118.0, 114.8, 113.9, 112.0, 40.2.

**2b** - According to general procedure **A** and using 1'-hydroxy-2'-acetonaphthone (136 mg, 1.00 mmol, 1.0 eq.), diethylaminobenzaldehyde (177 mg, 1.00 mmol, 1.0 eq.) and pyrrolidine (88 μL, 1.00 mmol, 1.0 eq.) in EtOH (3 mL), fluorophore **3b** (259 mg, 0.75 mmol, 75 %) was obtained as a red powder. <sup>1</sup>H NMR (400 MHz, Chloroform-*d*) δ 8.58 – 8.42 (m, 1H), 7.98 (d, *J* = 15.1 Hz, 1H), 7.87 (d, *J* = 8.9 Hz, 1H), 7.77 (d, *J* = 8.1 Hz, 1H), 7.68 – 7.42 (m, 5H), 7.29 (d, *J* = 8.9 Hz, 1H), 6.77 – 6.59 (m, 2H), 3.43 (q, *J* = 7.1 Hz, 4H), 1.22 (t, *J* = 7.1 Hz, 6H). <sup>13</sup>C NMR (101 MHz, CDCl<sub>3</sub>) δ 193.2, 164.1, 150.2, 146.4, 137.2, 131.4, 129.8, 127.5, 125.8, 124.5, 124.2, 121.9, 117.9, 114.1, 113.9, 111.5, 44.7, 12.8.

**2c** - According to general procedure **A** and using 1'-hydroxy-2'-acetonaphthone (136 mg, 1.00 mmol, 1.0 eq.), 4-(azetidin-1-yl)benzaldehyde **1** (161 mg, 1.00 mmol, 1.0 eq.) and pyrrolidine (88 μL, 1.00 mmol, 1.0 eq.) in EtOH (3 mL), fluorophore **3c** (211 mg, 0.64 mmol, 64 %) was obtained as a red powder. <sup>1</sup>H NMR (400 MHz, Chloroform-*d*) δ 8.49 (dd, *J* = 8.3, 1.3 Hz, 1H), 7.96 (d, *J* = 15.2 Hz, 1H), 7.86 (d, *J* = 8.9 Hz, 1H), 7.77 (dt, *J* = 8.2, 0.9 Hz, 1H), 7.67 – 7.47 (m, 5H), 7.33 – 7.27 (m, 1H), 6.47 – 6.32 (m, 2H), 3.99 (t, *J* = 7.3 Hz, 4H), 2.49 – 2.35 (m, 2H). <sup>13</sup>C NMR (101 MHz, CDCl<sub>3</sub>) δ 193.2, 164.2, 153.5, 146.4, 137.3, 130.8, 129.9, 127.5, 125.8, 124.5, 124.2, 123.4, 118.0, 114.9, 113.8, 110.9, 51.9, 16.7.

**2d** - According to general procedure **A** and using 1'-hydroxy-2'-acetonaphthone (136 mg, 1.00 mmol, 1.0 eq.), 4-(1-pyrrolidinyl)benzaldehyde **2** (175 mg, 1.00 mmol, 1.0 eq.) and pyrrolidine (88 μL, 1.00 mmol, 1.0 eq.) in EtOH (3 mL), fluorophore **3d** (271 mg, 0.79 mmol, 79 %) was obtained as a purple powder. <sup>1</sup>H NMR (400 MHz, Chloroform-*d*) δ 8.49 (dd, *J* = 8.3, 1.3 Hz, 1H), 7.99 (d, *J* = 15.1 Hz, 1H), 7.87 (d, *J* = 8.9 Hz, 1H), 7.77 (d, *J* = 8.1 Hz, 1H), 7.65 – 7.57 (m, 3H), 7.57 – 7.47 (m, 2H), 7.29 (d, *J* = 8.9 Hz, 1H), 6.63 – 6.53 (m, 2H), 3.49 – 3.18 (m, 4H), 2.10 – 1.96 (m, 4H). <sup>13</sup>C NMR (101 MHz, CDCl<sub>3</sub>) δ 193.2, 164.1, 150.1, 146.7, 137.3, 131.2, 129.8, 127.5, 125.8, 124.5, 124.3, 122.2, 117.9, 114.1, 112.0, 47.7, 25.6.

**2e** - According to general procedure **A** and using 1'-hydroxy-2'-acetonaphnone (186 mg, 1.00 mmol, 1.0 eq.), 4-methoxybenzaldehyde (121  $\mu$ L, 1.00 mmol, 1.0 eq.) and pyrrolidine (88  $\mu$ L, 1.00 mmol, 1.0 eq.) in EtOH (3 mL), the fluorophore **3e** (232 mg, 0.76 mmol, 76 %) was obtained as an orange powder.  $^1\text{H}$  NMR (400 MHz, Chloroform-*d*)  $\delta$  8.50 (dd,  $J = 8.2, 1.3$  Hz, 1H), 7.97 (d,  $J = 15.4$  Hz, 1H), 7.86 (d,  $J = 9.0$  Hz, 1H), 7.78 (d,  $J = 8.1$  Hz, 1H), 7.70 – 7.59 (m, 4H), 7.54 (ddd,  $J = 8.3, 6.9, 1.3$  Hz, 1H), 7.31 (d,  $J = 8.9$  Hz, 1H), 7.02 – 6.92 (m, 2H), 3.88 (s, 3H).  $^{13}\text{C}$  NMR (101 MHz,  $\text{CDCl}_3$ )  $\delta$  193.4, 164.4, 162.1, 145.1, 137.5, 130.7, 130.2, 127.5, 126.0, 124.6, 118.3, 114.7, 113.7, 55.6.

**3a** - According to general procedure **A** and using 2'-hydroxy-4-methoxy-acetophenone (166 mg, 1.00 mmol, 1.0 eq.), dimethylaminobenzaldehyde (149 mg, 1.00 mmol, 1.0 eq.) and pyrrolidine (88  $\mu$ L, 1.00 mmol, 1.0 eq.) in EtOH (3 mL), fluorophore **2a** (265 mg, 0.89 mmol, 89 %) was obtained as a red powder.  $^1\text{H}$  NMR (400 MHz, Chloroform-*d*)  $\delta$  7.93 – 7.79 (m, 2H), 7.60 – 7.52 (m, 2H), 7.38 (d,  $J = 15.2$  Hz, 1H), 6.74 – 6.67 (m, 2H), 6.53 – 6.41 (m, 2H), 3.85 (s, 3H), 3.05 (s, 6H).  $^{13}\text{C}$  NMR (101 MHz,  $\text{CDCl}_3$ )  $\delta$  192.0, 166.6, 165.8, 152.3, 145.6, 130.8, 122.7, 114.7, 112.0, 107.5, 101.2, 55.7, 40.3.

**3b** - According to general procedure **A** and using 2'-hydroxy-4-methoxy-acetophenone (166 mg, 1.00 mmol, 1.0 eq.), diethylaminobenzaldehyde (177 mg, 1.00 mmol, 1.0 eq.) and pyrrolidine (88  $\mu$ L, 1.00 mmol, 1.0 eq.) in EtOH (15 mL), the fluorophore **2b** (225 mg, 0.69 mmol, 69 %) was obtained as a red powder.  $^1\text{H}$  NMR (400 MHz, Chloroform-*d*)  $\delta$  7.96 – 7.74 (m, 2H), 7.60 – 7.45 (m, 2H), 7.34 (d,  $J = 15.2$  Hz, 1H), 6.73 – 6.54 (m, 2H), 6.54 – 6.38 (m, 2H), 3.82 (s, 3H), 3.38 (q,  $J = 7.1$  Hz, 4H), 1.18 (t,  $J = 7.0$  Hz, 6H).  $^{13}\text{C}$  NMR (101 MHz,  $\text{CDCl}_3$ )  $\delta$  191.8, 166.4, 165.6, 149.9, 145.6, 131.0, 121.7, 114.4, 113.8, 111.3, 107.2, 101.1, 55.5, 44.5, 12.6.

**3c** - According to general procedure **A** and using 2'-hydroxy-4-methoxy-acetophenone (166 mg, 1.00 mmol, 1.0 eq.), .), 4-(azetidin-1-yl)benzaldehyde **1** (161 mg, 1.00 mmol, 1.0 eq.) and pyrrolidine (88  $\mu$ L, 1.00 mmol, 1.0 eq.) in EtOH (15 mL), the fluorophore **2c** (118 mg, 0.73 mmol, 73 %) was obtained as a red powder.  $^1\text{H}$  NMR (400 MHz, Chloroform-*d*)  $\delta$  7.95 – 7.75 (m, 2H), 7.57 – 7.47 (m, 2H), 7.36 (d,  $J = 15.2$  Hz, 1H), 6.47 (dd,  $J = 7.1, 2.5$  Hz, 2H), 6.44 – 6.35 (m, 2H), 3.98 (t,  $J = 7.3$  Hz, 4H), 3.85 (s, 3H), 2.48 – 2.33 (m, 2H).  $^{13}\text{C}$  NMR (101 MHz,  $\text{CDCl}_3$ )  $\delta$  192.0, 166.6, 165.8, 153.4, 145.7, 131.1, 130.6, 123.4, 114.9, 114.5, 110.9, 107.5, 101.2, 55.7, 51.9, 16.7.

**3d** - According to general procedure **A** and using 2'-hydroxy-4-methoxy-acetophenone (231 mg, 1.39 mmol, 1.0 eq.), 4-(1-pyrrolidiny)benzaldehyde **2** (244 mg, 1.39 mmol, 1.0 eq.) and pyrrolidine (114  $\mu$ L, 1.39 mmol, 1.0 eq.) in EtOH (3 mL), fluorophore **2d** (312 mg, 0.96 mmol, 70 %) was obtained as a red powder.  $^1\text{H}$  NMR (400 MHz, Chloroform-*d*)  $\delta$  7.88 (d,  $J$  = 15.2 Hz, 1H), 7.85 – 7.81 (m, 1H), 7.60 – 7.50 (m, 2H), 7.35 (d,  $J$  = 15.1 Hz, 1H), 6.61 – 6.51 (m, 2H), 6.50 – 6.41 (m, 2H), 3.85 (s, 3H), 3.42 – 3.31 (m, 4H), 2.09 – 1.96 (m, 4H).  $^{13}\text{C}$  NMR (101 MHz,  $\text{CDCl}_3$ )  $\delta$  192.0, 166.6, 165.7, 149.9, 145.9, 131.0, 122.1, 114.5, 114.0, 111.9, 107.4, 101.2, 55.7, 47.7, 25.6.

**3e** – According to general procedure **A** and using 2'-hydroxy-4-methoxy-acetophenone (166 mg, 1.00 mmol, 1.0 eq.), 4-methoxybenzaldehyde (136 mg, 1.00 mmol, 1.0 eq.) and pyrrolidine (88  $\mu$ L, 1.00 mmol, 1.0 eq.) in EtOH (3 mL), fluorophore **2e** (199 mg, 0.70 mmol, 70 %) was obtained as a yellow powder.  $^1\text{H}$  NMR (400 MHz, Chloroform-*d*)  $\delta$  7.92 – 7.75 (m, 2H), 7.66 – 7.53 (m, 2H), 7.46 (d,  $J$  = 15.4 Hz, 1H), 7.01 – 6.83 (m, 2H), 6.48 (d,  $J$  = 7.8 Hz, 2H), 3.86 (d,  $J$  = 2.0 Hz, 6H).  $^{13}\text{C}$  NMR (101 MHz,  $\text{CDCl}_3$ )  $\delta$  191.7, 166.5, 165.9, 161.6, 144.1, 130.9, 130.2, 127.4, 117.7, 114.3, 114.0, 107.4, 100.9, 55.4, 55.3.

## 2. Spectroscopy

### a. General

Fluorescence spectra were recorded on a Horiba Jobin-Yvon Fluorolog-3<sup>®</sup> spectrofluorimeter equipped with Hamamatsu R928 or water cooled R2658 photomultiplier tubes. Spectra were reference corrected for both the intensity variations of the excitation source light (lamp and grating) and the emission spectral response (detector and grating).

Absolute fluorescence quantum yields in crystal  $\Phi_s$  were measured using a calibrated integrative sphere collecting all the emission ( $2\pi$  steradians covered with spectralon<sup>®</sup>), model G8 from GMP (Renens, Swiss) as described by de Mello *et al.* and Porrès *et al.*<sup>1,2</sup> For each sample, four measurements were made using the same excitation and emission monochromatic band pass (slits opening) to give four integrated intensities. Quantum yield are therefore given by equation (1):

$$\Phi_s = \frac{E_{in} - E_{empty}}{ND \times (L_{empty} - L_{in})}$$



where  $E_{in}$  and  $E_{empty}$  are the integrated fluorescence resulting of a direct excitation of the sample and the integrated fluorescence without any sample (the background of the sphere),  $L_{empty}$  is the integrated excitation profile with the empty sphere, and  $L_{in}$  is the integrated excitation profile with the sample inside the sphere. For the determination of  $L_{empty}$  and  $L_{in}$ , a neutral density filter (ND = 0.5 %) was used to reduce the intensity without changing the excitation profile.

b. Crystal-state fluorescence emission spectra of 1a-e, 2a-e, 3a-e.

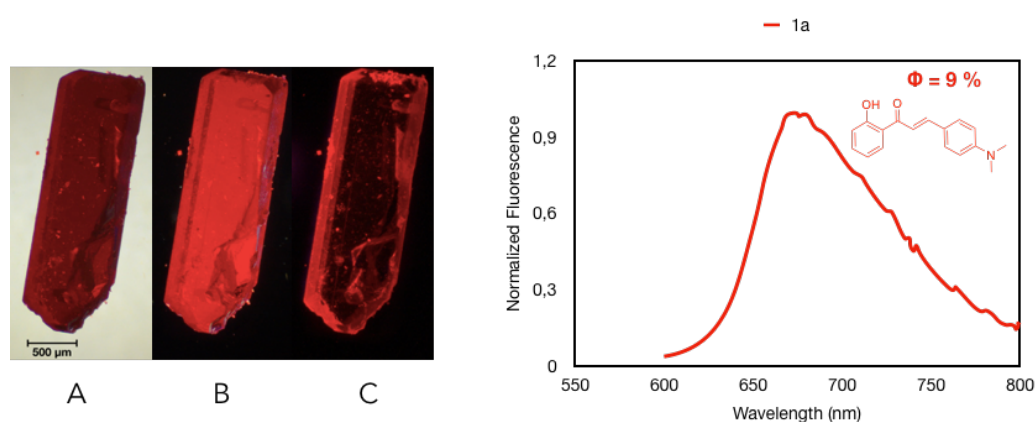

**Figure SI 1** – Left: Crystal **1a** under sunlight (A), polarized light (B), UV irradiation (C). Right: Fluorescence emission spectrum of crystal **1a** measured with an integration sphere,  $\lambda_{exc} = 450$  nm.

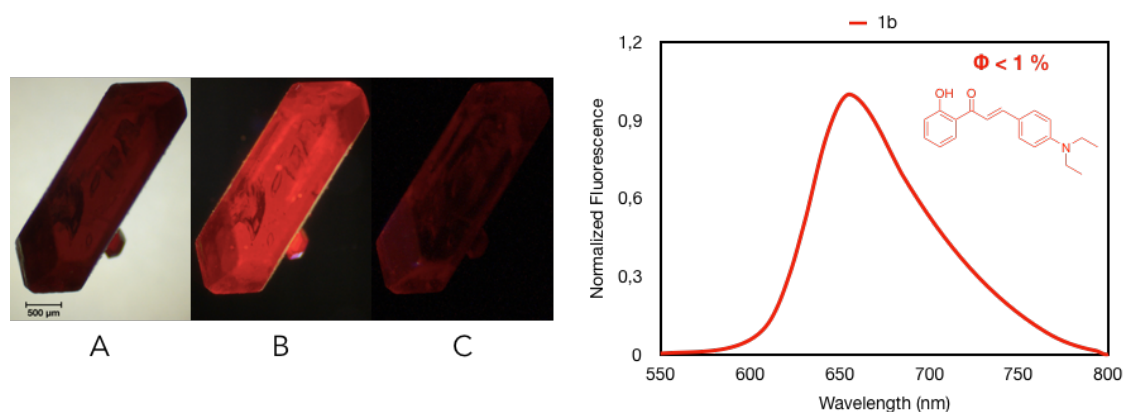

**Figure SI 2** – Left: Crystal **1b** under sunlight (A), polarized light (B), UV irradiation (C). Right: Fluorescence emission spectrum of crystal **1b** measured with an integration sphere,  $\lambda_{exc} = 450$  nm.

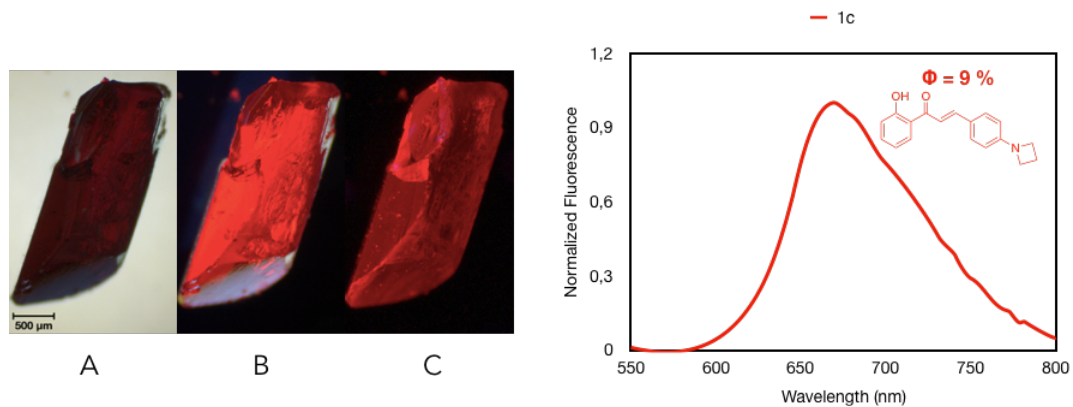

**Figure SI 3** – Left: Crystal **1c** under sunlight (A), polarized light (B), UV irradiation (C). Right: Fluorescence emission spectrum of crystal **1c** measured with an integration sphere,  $\lambda_{\text{exc}} = 450 \text{ nm}$ .

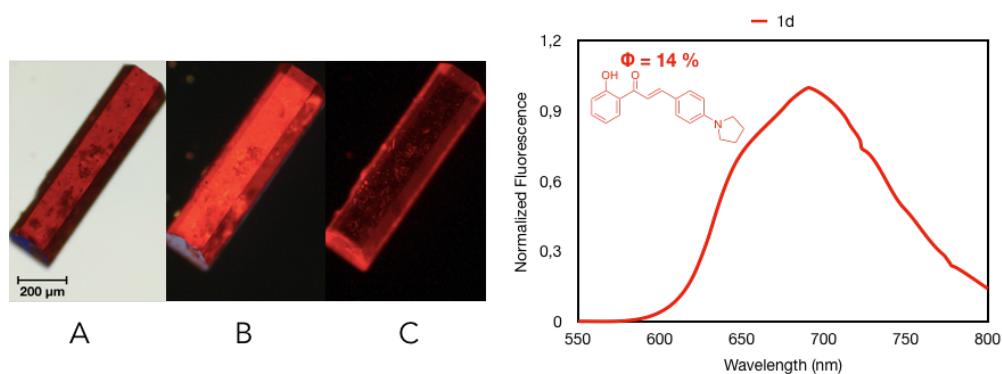

**Figure SI 4** – Left: Crystal **1d** under sunlight (A), polarized light (B), UV irradiation (C). Right: Fluorescence emission spectrum of crystal **1d** measured with an integration sphere,  $\lambda_{\text{exc}} = 450 \text{ nm}$ .

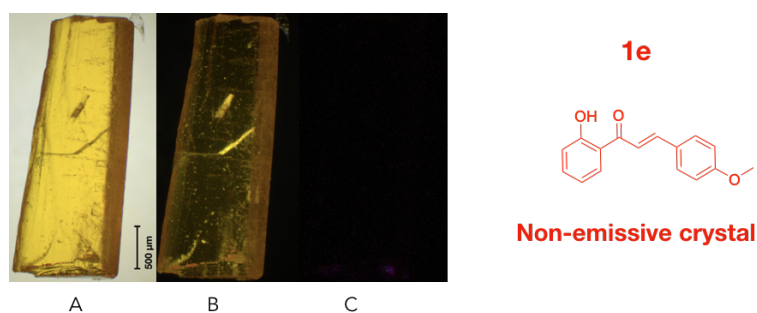

**Figure SI 5** – Left: Crystal **1e** under sunlight (A), polarized light (B), UV irradiation (C). Right: Molecular structure of crystal **1e** (not emissive enough to measure a fluorescence emission spectrum).

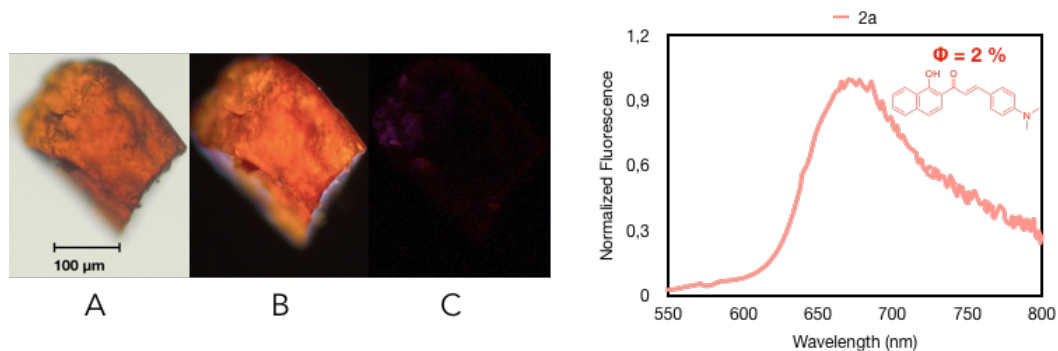

**Figure SI 6** – Left: Crystal **2a** under sunlight (A), polarized light (B), UV irradiation (C). **Right**: Fluorescence emission spectrum of crystal **2a** measured with an integration sphere,  $\lambda_{\text{exc}} = 450 \text{ nm}$ .

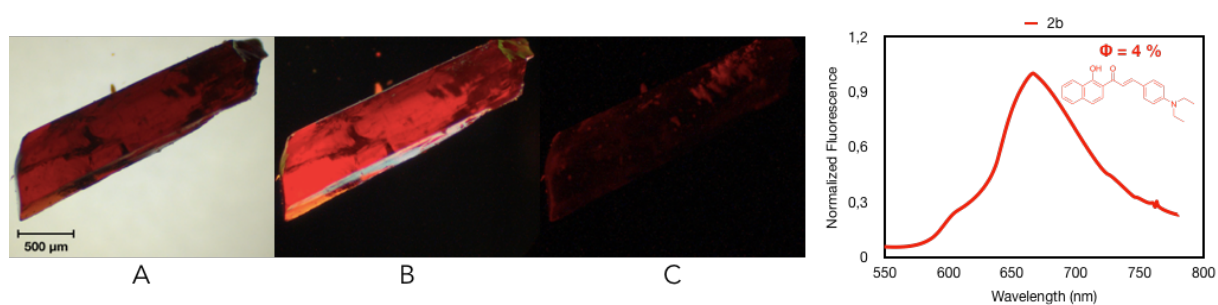

**Figure SI 7** – Left: Crystal **2b** under sunlight (A), polarized light (B), UV irradiation (C). **Right**: Fluorescence emission spectrum of crystal **2b** measured with an integration sphere,  $\lambda_{\text{exc}} = 450 \text{ nm}$ .

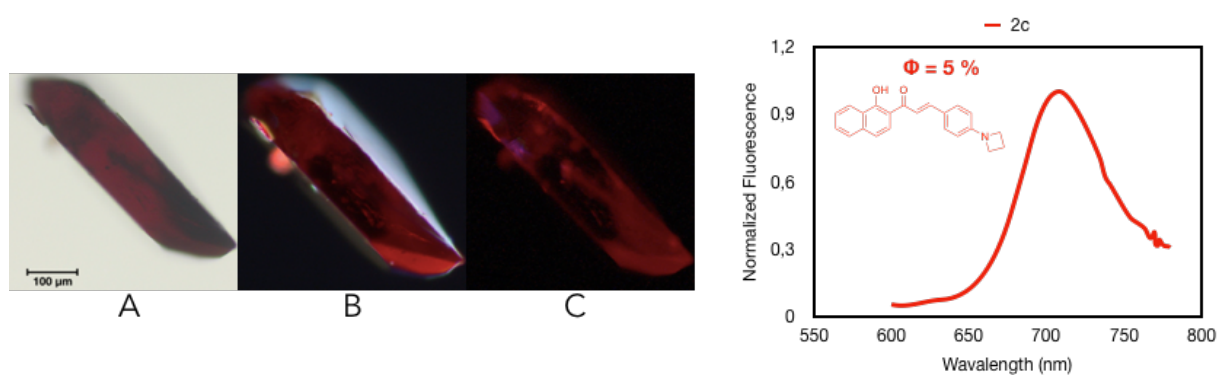

**Figure SI 8** – Left: Crystal **2c** under sunlight (A), polarized light (B), UV irradiation (C). **Right**: Fluorescence emission spectrum of crystal **2c** measured with an integration sphere,  $\lambda_{\text{exc}} = 450 \text{ nm}$ .

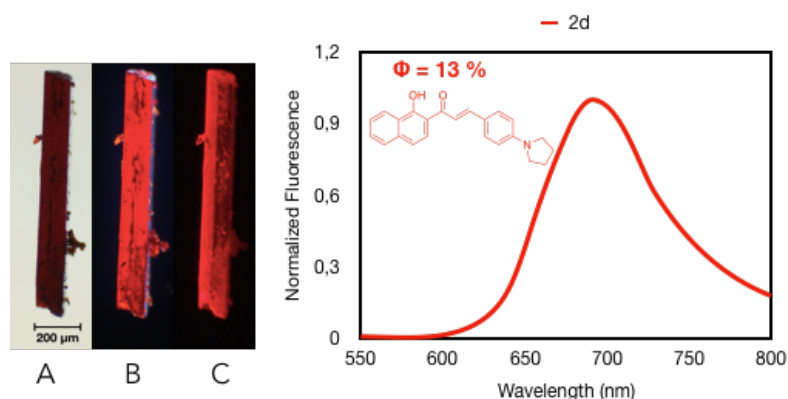

**Figure SI 9** – Left: Crystal **2d** under sunlight (A), polarized light (B), UV irradiation (C). Right: Fluorescence emission spectrum of crystal **2d** measured with an integration sphere,  $\lambda_{\text{exc}} = 450 \text{ nm}$ .

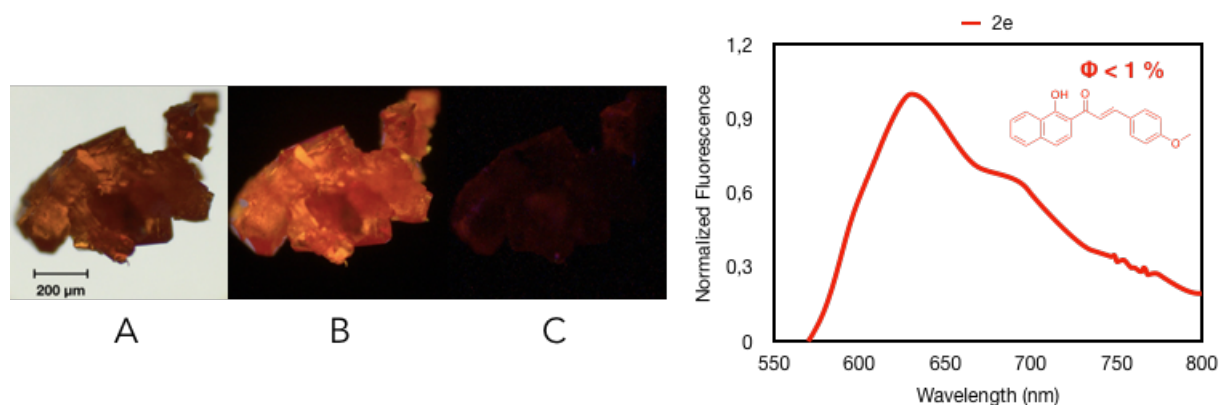

**Figure SI 10** – Left: Crystal **2e** under sunlight (A), polarized light (B), UV irradiation (C). Right: Fluorescence emission spectrum of crystal **2e** measured with an integration sphere,  $\lambda_{\text{exc}} = 450 \text{ nm}$ .

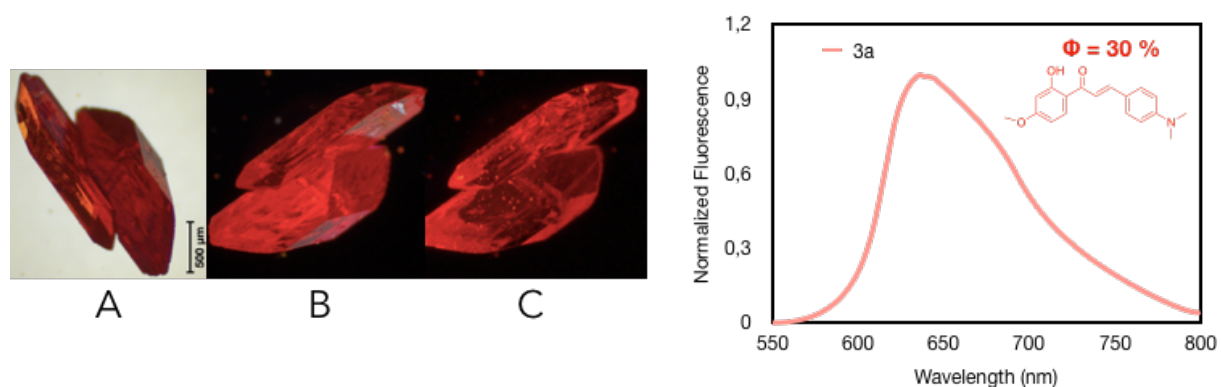

**Figure SI 11** – Left: Crystal **3a** under sunlight (A), polarized light (B), UV irradiation (C). Right: Fluorescence emission spectrum of crystal **3a** measured with an integration sphere,  $\lambda_{\text{exc}} = 450 \text{ nm}$ .

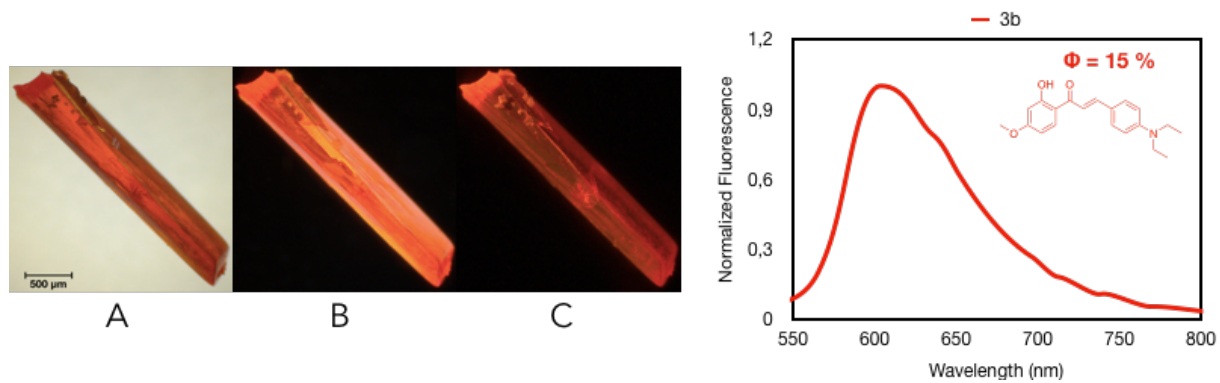

**Figure SI 12** – Left: Crystal **3b** under sunlight (A), polarized light (B), UV irradiation (C). Right: Fluorescence emission spectrum of crystal **3b** measured with an integration sphere,  $\lambda_{\text{exc}} = 450$  nm.

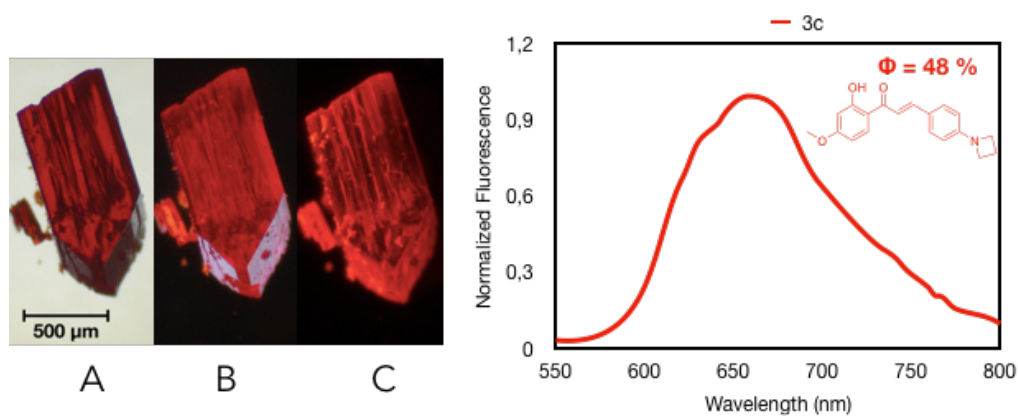

**Figure SI 13** – Left: Crystal **3c** under sunlight (A), polarized light (B), UV irradiation (C). Right: Fluorescence emission spectrum of crystal **3c** measured with an integration sphere,  $\lambda_{\text{exc}} = 450$  nm.

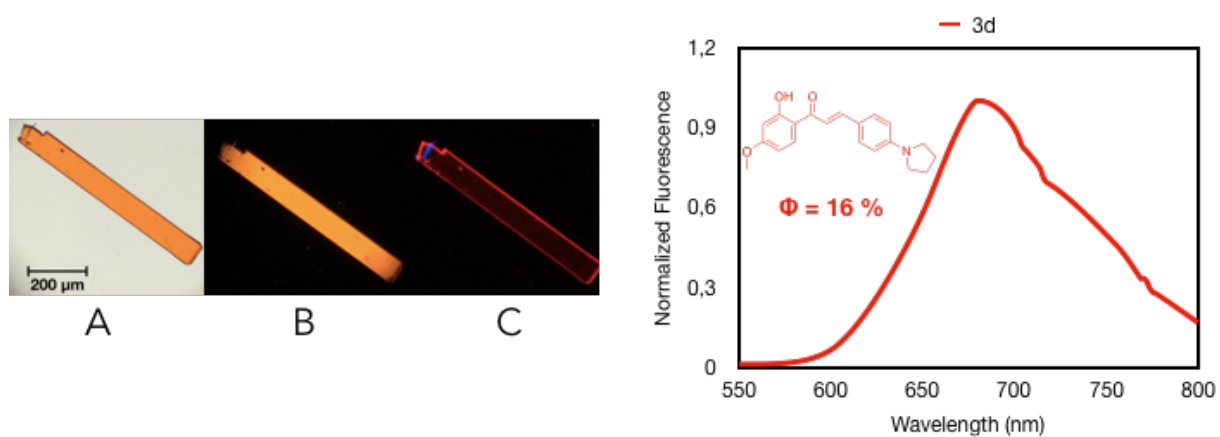

**Figure SI 14** – Left: Crystal **3d** under sunlight (A), polarized light (B), UV irradiation (C). Right: Fluorescence emission spectrum of crystal **3d** measured with an integration sphere,  $\lambda_{\text{exc}} = 450 \text{ nm}$ .

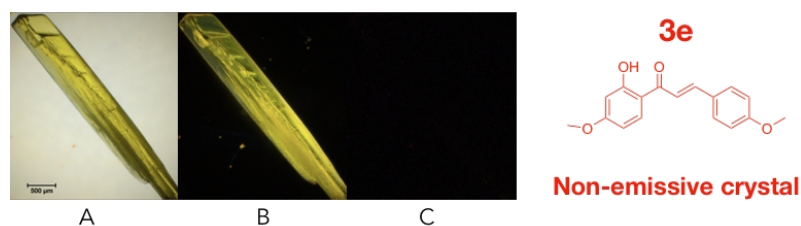

**Figure SI 15** – Left: Crystal **3e** under sunlight (A), polarized light (B), UV irradiation (C). Right: Molecular structure of crystal **3e** (not emissive enough to measure a fluorescence emission spectrum).

### 3. Single-crystal X-ray crystallography

#### a. General

Suitable crystals were of molecular complexes **1a-3e** were obtained by slow liquid/liquid diffusion of MeOH in concentrated solution in  $\text{CHCl}_3$ . Crystals structure were determined on an Xcalibur Gemini kappa-geometry diffractometer equipped with an Atlas CCD and a Copper X-ray source ( $\lambda = 1.54184 \text{ \AA}$ ). Intensities were collected by means of the CrysAlisPro software<sup>3</sup>. Reflection indexing, unit-cell parameters refinement, Lorentz-polarization correction, peak integration and background determination were carried out with the CrysAlisPro software [1]. An analytical absorption correction was applied using the modeled faces of the crystals.<sup>4</sup> The resulting sets of *hkl* was used for structure solution and refinement. The structures were solved with the ShelXT<sup>5</sup> structure solution program using the intrinsic phasing solution method and by using Olex2<sup>6</sup> as the graphical interface. The model was refined with version 2018/3 of ShelXL<sup>7</sup> using least-squares minimization.

CCDC 2089012-2089026 contain the supplementary crystallographic data for this paper. These data can be obtained free of charge from The Cambridge Crystallographic Date Centre via [www.ccdc.cam.ac.uk/data\\_request/cif](http://www.ccdc.cam.ac.uk/data_request/cif).

b. Intramolecular parameters

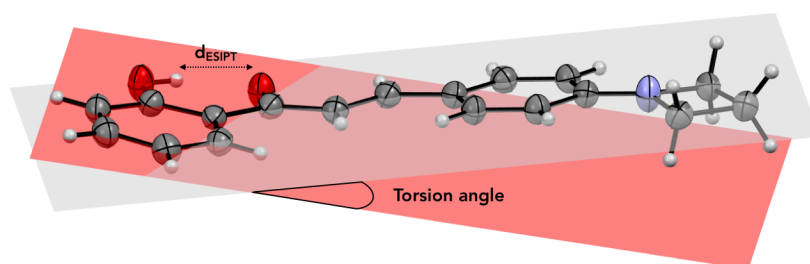

**Figure SI 16** – Definition of parameters from XRD datas.

c. Data for compounds 1a-e, 2a-e, 3a-e.

**Table SI 1.** Crystallographic Data Collection and Refinement Statistics

| Compound                     | 1a                                              | 1b                                              | 1c                                              | 1d                                              | 1e                                             |
|------------------------------|-------------------------------------------------|-------------------------------------------------|-------------------------------------------------|-------------------------------------------------|------------------------------------------------|
| Formula                      | C <sub>17</sub> H <sub>17</sub> NO <sub>2</sub> | C <sub>19</sub> H <sub>21</sub> NO <sub>2</sub> | C <sub>18</sub> H <sub>17</sub> NO <sub>2</sub> | C <sub>19</sub> H <sub>19</sub> NO <sub>2</sub> | C <sub>16</sub> H <sub>14</sub> O <sub>3</sub> |
| $D_{calc.}/g\text{ cm}^{-3}$ | 1.309                                           | 1.281                                           | 1.306                                           | 1.296                                           | 1.350                                          |
| $\mu/\text{mm}^{-1}$         | 0.684                                           | 0.654                                           | 0.085                                           | 0.084                                           | 0.755                                          |
| Formula Weight               | 267.31                                          | 295.37                                          | 279.32                                          | 293.35                                          | 254.27                                         |
| Colour                       | red                                             | red                                             | dark violet                                     | dark violet                                     | yellow                                         |
| Shape                        | block                                           | block                                           | block                                           | block                                           | block                                          |
| Size/mm <sup>3</sup>         | 0.57×0.35×0.30                                  | 0.42×0.30×0.09                                  | 0.60×0.47×0.23                                  | 0.45×0.30×0.29                                  | 0.49×0.36×0.26                                 |
| T/K                          | 150.01(10)                                      | 150.01(10)                                      | 150.01(10)                                      | 150.00(10)                                      | 150.00(10)                                     |
| Crystal System               | monoclinic                                      | monoclinic                                      | monoclinic                                      | monoclinic                                      | orthorhombic                                   |
| Flack Parameter              | N.A.                                            | N.A.                                            | N.A.                                            | N.A.                                            | 0.03(17)                                       |
| Hoofit Parameter             | N.A.                                            | N.A.                                            | N.A.                                            | N.A.                                            | -0.08(7)                                       |
| Space Group                  | <i>P2<sub>1</sub>/c</i>                         | <i>P2<sub>1</sub>/n</i>                         | <i>P2<sub>1</sub>/n</i>                         | <i>P2<sub>1</sub>/c</i>                         | <i>Pca2<sub>1</sub></i>                        |
| <i>a</i> /Å                  | 12.0443(8)                                      | 8.7822(7)                                       | 8.8738(10)                                      | 13.1158(17)                                     | 25.3047(16)                                    |
| <i>b</i> /Å                  | 10.1586(5)                                      | 16.9997(13)                                     | 15.8093(19)                                     | 9.9987(11)                                      | 3.9444(2)                                      |
| <i>c</i> /Å                  | 12.3923(9)                                      | 10.4535(8)                                      | 10.3070(12)                                     | 12.9251(19)                                     | 12.5302(9)                                     |
| $\beta/^\circ$               | 90                                              | 90                                              | 90                                              | 90                                              | 90                                             |
| $\alpha/^\circ$              | 116.530(9)                                      | 101.025(7)                                      | 100.799(11)                                     | 117.486(18)                                     | 90                                             |
| $\gamma/^\circ$              | 90                                              | 90                                              | 90                                              | 90                                              | 90                                             |
| <i>V</i> /Å <sup>3</sup>     | 1356.58(18)                                     | 1531.9(2)                                       | 1420.3(3)                                       | 1503.7(4)                                       | 1250.66(14)                                    |
| <i>Z</i>                     | 4                                               | 4                                               | 4                                               | 4                                               | 4                                              |
| <i>Z'</i>                    | 1                                               | 1                                               | 1                                               | 1                                               | 1                                              |
| Wavelength/Å                 | 1.54184                                         | 1.54184                                         | 0.71073                                         | 0.71073                                         | 1.54184                                        |
| Radiation type               | Cu K $\alpha$                                   | Cu K $\alpha$                                   | Mo K $\alpha$                                   | Mo K $\alpha$                                   | Cu K $\alpha$                                  |
| $2\theta_{min}/^\circ$       | 4.102                                           | 5.035                                           | 2.668                                           | 2.739                                           | 4.967                                          |
| $2\theta_{max}/^\circ$       | 66.982                                          | 67.078                                          | 29.666                                          | 29.480                                          | 66.879                                         |
| Measured Refl's.             | 14375                                           | 16326                                           | 12533                                           | 10749                                           | 10990                                          |
| Indep't Refl's               | 2410                                            | 2721                                            | 3455                                            | 3708                                            | 2198                                           |
| Refl's $I \geq 2\sigma(I)$   | 2285                                            | 2356                                            | 2494                                            | 2947                                            | 2146                                           |
| $R_{int}$                    | 0.0383                                          | 0.0564                                          | 0.0407                                          | 0.0320                                          | 0.0499                                         |
| Parameters                   | 185                                             | 203                                             | 192                                             | 201                                             | 175                                            |
| Restraints                   | 0                                               | 0                                               | 0                                               | 0                                               | 1                                              |
| Largest Peak                 | 0.190                                           | 0.205                                           | 0.350                                           | 0.314                                           | 0.149                                          |
| Deepest Hole                 | -0.220                                          | -0.238                                          | -0.261                                          | -0.264                                          | -0.152                                         |
| GooF                         | 1.027                                           | 1.055                                           | 1.068                                           | 1.109                                           | 1.065                                          |
| $wR_2$ (all data)            | 0.1049                                          | 0.1112                                          | 0.1765                                          | 0.1711                                          | 0.1035                                         |
| $wR_2$                       | 0.1030                                          | 0.1035                                          | 0.1462                                          | 0.1518                                          | 0.1008                                         |
| $R_1$ (all data)             | 0.0396                                          | 0.0473                                          | 0.0841                                          | 0.0700                                          | 0.0389                                         |
| $R_1$                        | 0.0381                                          | 0.0405                                          | 0.0595                                          | 0.0564                                          | 0.0362                                         |



| Compound                     | 2a                                              | 2b                                              | 2c                                              | 2d                                              | 2e                                             |
|------------------------------|-------------------------------------------------|-------------------------------------------------|-------------------------------------------------|-------------------------------------------------|------------------------------------------------|
| Formula                      | C <sub>21</sub> H <sub>19</sub> NO <sub>2</sub> | C <sub>23</sub> H <sub>23</sub> NO <sub>2</sub> | C <sub>22</sub> H <sub>19</sub> NO <sub>2</sub> | C <sub>23</sub> H <sub>21</sub> NO <sub>2</sub> | C <sub>20</sub> H <sub>16</sub> O <sub>3</sub> |
| $D_{calc.}/g\text{ cm}^{-3}$ | 1.317                                           | 1.255                                           | 1.324                                           | 1.306                                           | 1.367                                          |
| $\mu/\text{mm}^{-1}$         | 0.670                                           | 0.627                                           | 0.671                                           | 0.656                                           | 0.736                                          |
| Formula Weight               | 317.37                                          | 345.42                                          | 329.38                                          | 343.41                                          | 304.33                                         |
| Colour                       | red                                             | dark red                                        | dark violet                                     | violet                                          | yellow                                         |
| Shape                        | block                                           | plate                                           | block                                           | block                                           | block                                          |
| Size/mm <sup>3</sup>         | 0.19×0.17×0.12                                  | 0.35×0.26×0.10                                  | 0.40×0.19×0.18                                  | 0.33×0.21×0.13                                  | 0.15×0.15×0.09                                 |
| T/K                          | 150.00(10)                                      | 150.00(10)                                      | 150.00(10)                                      | 150.01(10)                                      | 150.02(11)                                     |
| Crystal System               | triclinic                                       | monoclinic                                      | monoclinic                                      | monoclinic                                      | orthorhombic                                   |
| Flack Parameter              | N.A.                                            | N.A.                                            | N.A.                                            | N.A.                                            | N.A.                                           |
| Hooft Parameter              | N.A.                                            | N.A.                                            | N.A.                                            | N.A.                                            | N.A.                                           |
| Space Group                  | <i>P</i> -1                                     | <i>P</i> 2 <sub>1</sub> / <i>n</i>              | <i>C</i> 2/ <i>c</i>                            | <i>C</i> 2/ <i>c</i>                            | <i>Pbca</i>                                    |
| <i>a</i> /Å                  | 8.9885(12)                                      | 8.2451(5)                                       | 14.0991(17)                                     | 14.2455(10)                                     | 15.1108(17)                                    |
| <i>b</i> /Å                  | 11.7602(11)                                     | 9.5049(6)                                       | 15.5571(19)                                     | 15.1719(12)                                     | 9.3204(8)                                      |
| <i>c</i> /Å                  | 16.0667(12)                                     | 23.4203(15)                                     | 15.216(2)                                       | 16.1994(15)                                     | 21.004(2)                                      |
| $\alpha/^\circ$              | 77.958(7)                                       | 90                                              | 90                                              | 90                                              | 90                                             |
| $\beta/^\circ$               | 85.456(9)                                       | 95.132(5)                                       | 97.917(11)                                      | 94.197(8)                                       | 90                                             |
| $\gamma/^\circ$              | 74.512(10)                                      | 90                                              | 90                                              | 90                                              | 90                                             |
| $V/\text{Å}^3$               | 1600.2(3)                                       | 1828.1(2)                                       | 3305.7(7)                                       | 3491.8(5)                                       | 2958.1(5)                                      |
| <i>Z</i>                     | 4                                               | 4                                               | 8                                               | 8                                               | 8                                              |
| <i>Z'</i>                    | 2                                               | 1                                               | 1                                               | 1                                               | 1                                              |
| Wavelength/Å                 | 1.54184                                         | 1.54184                                         | 1.54184                                         | 1.54184                                         | 1.54184                                        |
| Radiation type               | Cu K $\alpha$                                   | Cu K $\alpha$                                   | Cu K $\alpha$                                   | Cu K $\alpha$                                   | Cu K $\alpha$                                  |
| $2\theta_{min}/^\circ$       | 3.977                                           | 3.790                                           | 4.254                                           | 4.263                                           | 4.210                                          |
| $2\theta_{max}/^\circ$       | 67.282                                          | 66.886                                          | 66.942                                          | 67.041                                          | 67.011                                         |
| Measured Refl's.             | 16841                                           | 19766                                           | 9835                                            | 18525                                           | 16672                                          |
| Indep't Refl's               | 5629                                            | 3230                                            | 2921                                            | 3092                                            | 2616                                           |
| Refl's $I \geq 2\sigma(I)$   | 4434                                            | 2668                                            | 2543                                            | 2643                                            | 2264                                           |
| $R_{int}$                    | 0.0379                                          | 0.0557                                          | 0.0481                                          | 0.0463                                          | 0.0560                                         |
| Parameters                   | 439                                             | 238                                             | 228                                             | 236                                             | 210                                            |
| Restraints                   | 0                                               | 0                                               | 0                                               | 0                                               | 0                                              |
| Largest Peak                 | 0.230                                           | 0.174                                           | 0.253                                           | 0.157                                           | 0.209                                          |
| Deepest Hole                 | -0.307                                          | -0.187                                          | -0.224                                          | -0.242                                          | -0.190                                         |
| Goof                         | 1.032                                           | 1.037                                           | 1.066                                           | 1.028                                           | 1.053                                          |
| $wR_2$ (all data)            | 0.1587                                          | 0.1320                                          | 0.1532                                          | 0.1330                                          | 0.1328                                         |
| $wR_2$                       | 0.1426                                          | 0.1206                                          | 0.1460                                          | 0.1248                                          | 0.1231                                         |
| $R_1$ (all data)             | 0.0651                                          | 0.0543                                          | 0.0575                                          | 0.0534                                          | 0.0518                                         |
| $R_1$                        | 0.0525                                          | 0.0448                                          | 0.0519                                          | 0.0467                                          | 0.0457                                         |

| Compound                          | 3a                                              | 3b                                              | 3c                                              | 3d                                              | 3e                                             |
|-----------------------------------|-------------------------------------------------|-------------------------------------------------|-------------------------------------------------|-------------------------------------------------|------------------------------------------------|
| Formula                           | C <sub>18</sub> H <sub>19</sub> NO <sub>3</sub> | C <sub>20</sub> H <sub>23</sub> NO <sub>3</sub> | C <sub>19</sub> H <sub>19</sub> NO <sub>3</sub> | C <sub>20</sub> H <sub>21</sub> NO <sub>3</sub> | C <sub>17</sub> H <sub>16</sub> O <sub>4</sub> |
| $D_{calc.}/g\text{ cm}^{-3}$      | 1.287                                           | 1.282                                           | 1.285                                           | 1.292                                           | 1.344                                          |
| $\mu/\text{mm}^{-1}$              | 0.088                                           | 0.688                                           | 0.702                                           | 0.087                                           | 0.784                                          |
| Formula Weight                    | 297.34                                          | 325.39                                          | 309.35                                          | 323.38                                          | 284.30                                         |
| Colour                            | dark violet                                     | yellow                                          | red                                             | red                                             | yellow                                         |
| Shape                             | block                                           | block                                           | block                                           | plate                                           | plate                                          |
| Size/mm <sup>3</sup>              | 0.79×0.45×0.36                                  | 0.69×0.36×0.28                                  | 0.29×0.24×0.18                                  | 0.40×0.33×0.10                                  | 0.57×0.25×0.15                                 |
| T/K                               | 150.00(10)                                      | 150.00(10)                                      | 150.00(10)                                      | 150.00(10)                                      | 150.01(10)                                     |
| Crystal System                    | triclinic                                       | monoclinic                                      | monoclinic                                      | monoclinic                                      | triclinic                                      |
| Flack Parameter                   | N.A.                                            | -0.02(17)                                       | N.A.                                            | N.A.                                            | N.A.                                           |
| Hooft Parameter                   | N.A.                                            | 0.09(6)                                         | N.A.                                            | N.A.                                            | N.A.                                           |
| Space Group                       | <i>P</i> -1                                     | <i>P</i> 2 <sub>1</sub>                         | <i>P</i> 2 <sub>1</sub> / <i>n</i>              | <i>P</i> 2 <sub>1</sub> / <i>c</i>              | <i>P</i> -1                                    |
| <i>a</i> /Å                       | 10.2227(7)                                      | 5.1591(2)                                       | 11.0731(10)                                     | 13.6857(16)                                     | 9.1891(6)                                      |
| <i>b</i> /Å                       | 12.1794(8)                                      | 22.5328(10)                                     | 12.6166(9)                                      | 10.0690(9)                                      | 9.2697(6)                                      |
| <i>c</i> /Å                       | 13.3210(8)                                      | 14.6030(7)                                      | 12.3419(10)                                     | 13.1089(13)                                     | 17.1760(7)                                     |
| $\alpha/^\circ$                   | 91.336(5)                                       | 90                                              | 90                                              | 90                                              | 101.119(4)                                     |
| $\beta/^\circ$                    | 91.101(5)                                       | 96.692(4)                                       | 112.002(10)                                     | 113.007(13)                                     | 91.071(4)                                      |
| $\gamma/^\circ$                   | 112.224(6)                                      | 90                                              | 90                                              | 90                                              | 101.323(5)                                     |
| <i>V</i> /Å <sup>3</sup>          | 1534.22(18)                                     | 1686.03(13)                                     | 1598.6(3)                                       | 1662.7(3)                                       | 1405.22(14)                                    |
| <i>Z</i>                          | 4                                               | 4                                               | 4                                               | 4                                               | 4                                              |
| <i>Z'</i>                         | 2                                               | 2                                               | 1                                               | 1                                               | 2                                              |
| Wavelength/Å                      | 0.71073                                         | 1.54184                                         | 1.54184                                         | 0.71073                                         | 1.54184                                        |
| Radiation type                    | Mo K $\alpha$                                   | Cu K $\alpha$                                   | Cu K $\alpha$                                   | Mo K $\alpha$                                   | Cu K $\alpha$                                  |
| $2\theta_{min}/^\circ$            | 3.061                                           | 3.624                                           | 4.584                                           | 3.122                                           | 4.917                                          |
| $2\theta_{max}/^\circ$            | 29.661                                          | 67.059                                          | 66.974                                          | 29.644                                          | 67.104                                         |
| Measured Refl's.                  | 40547                                           | 17423                                           | 17200                                           | 22942                                           | 37745                                          |
| Indep't Refl's                    | 7773                                            | 5359                                            | 2829                                            | 4211                                            | 4938                                           |
| Refl's $I \geq 2\sigma(I)$        | 5878                                            | 5237                                            | 2466                                            | 3171                                            | 4177                                           |
| <i>R</i> <sub>int</sub>           | 0.0464                                          | 0.0411                                          | 0.0552                                          | 0.0440                                          | 0.0527                                         |
| Parameters                        | 406                                             | 442                                             | 210                                             | 220                                             | 386                                            |
| Restraints                        | 0                                               | 1                                               | 0                                               | 0                                               | 0                                              |
| Largest Peak                      | 0.294                                           | 0.244                                           | 0.165                                           | 0.318                                           | 0.183                                          |
| Deepest Hole                      | -0.313                                          | -0.253                                          | -0.205                                          | -0.271                                          | -0.255                                         |
| Goof                              | 1.091                                           | 1.092                                           | 1.053                                           | 1.106                                           | 1.035                                          |
| <i>wR</i> <sub>2</sub> (all data) | 0.2039                                          | 0.1233                                          | 0.1167                                          | 0.1748                                          | 0.1175                                         |
| <i>wR</i> <sub>2</sub>            | 0.1844                                          | 0.1214                                          | 0.1109                                          | 0.1507                                          | 0.1091                                         |
| <i>R</i> <sub>1</sub> (all data)  | 0.0839                                          | 0.0446                                          | 0.0475                                          | 0.0779                                          | 0.0477                                         |
| <i>R</i> <sub>1</sub>             | 0.0643                                          | 0.0424                                          | 0.0413                                          | 0.0583                                          | 0.0401                                         |

d. Additional data for compounds 1a-e, 2a-e, 3a-e.

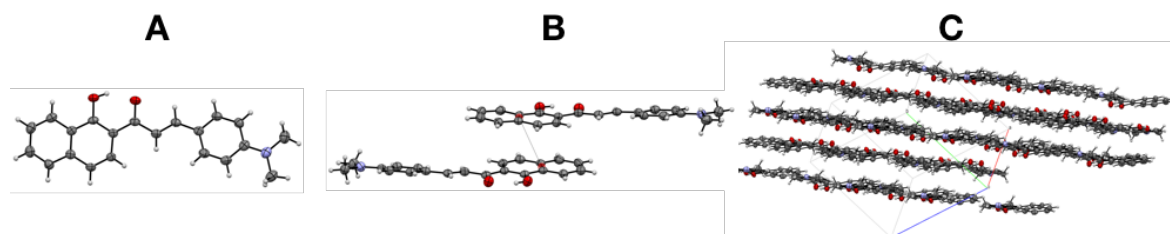

Figure SI 17 – ORTEP structure (A), type of dimer (B) and 3D arrangements (C) of crystal 2a.

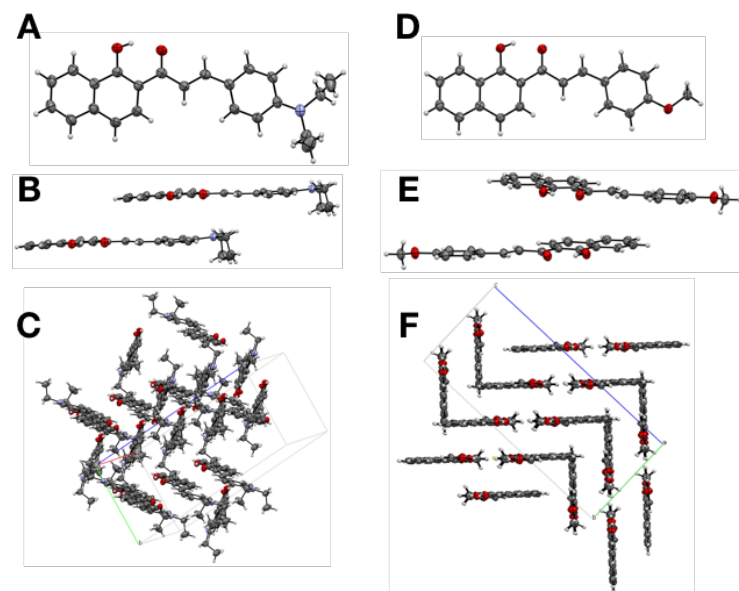

Figure SI 18 – ORTEP structure (A, D), type of dimer (B, E) and 3D arrangements (D, F) of crystal 2b and 2e respectively.

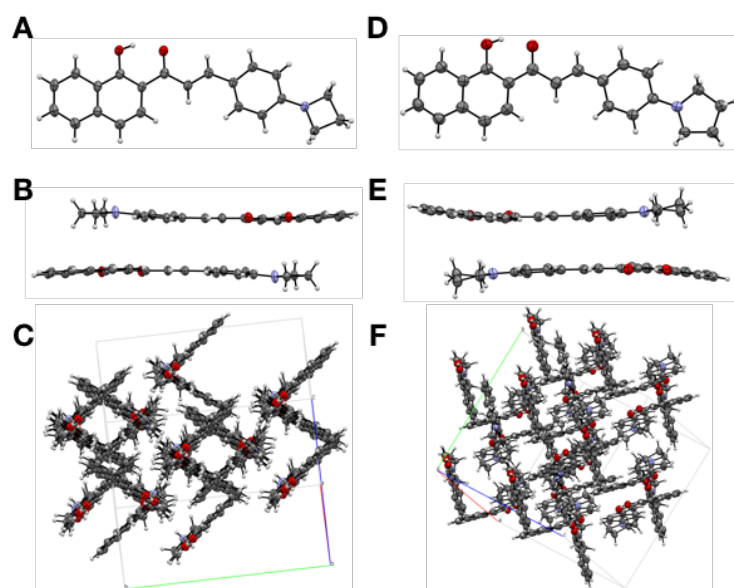

**Figure SI 19** – ORTEP structure (A, D), type of dimer (B, E) and 3D arrangements (D, F) of crystal **2c** and **2d** respectively.

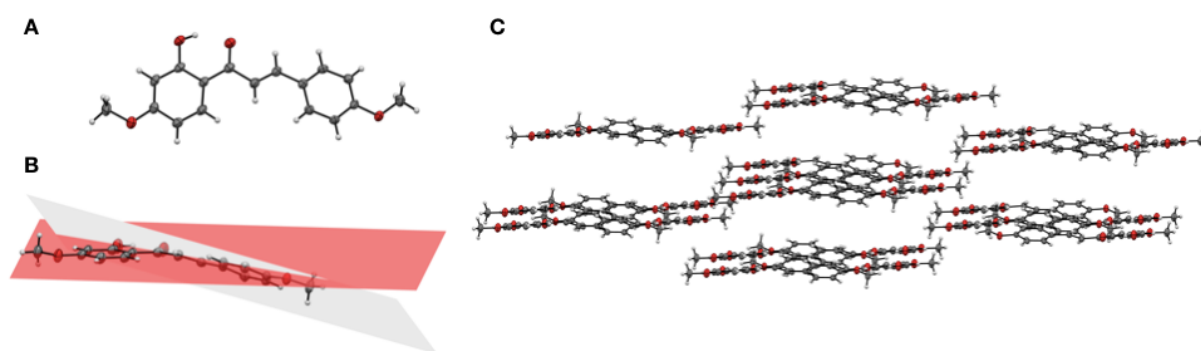

**Figure SI 20** – ORTEP structure (A), intramolecular torsion (B) and 3D arrangements (C) of crystal **3e**.

#### 4. NMR Spectra

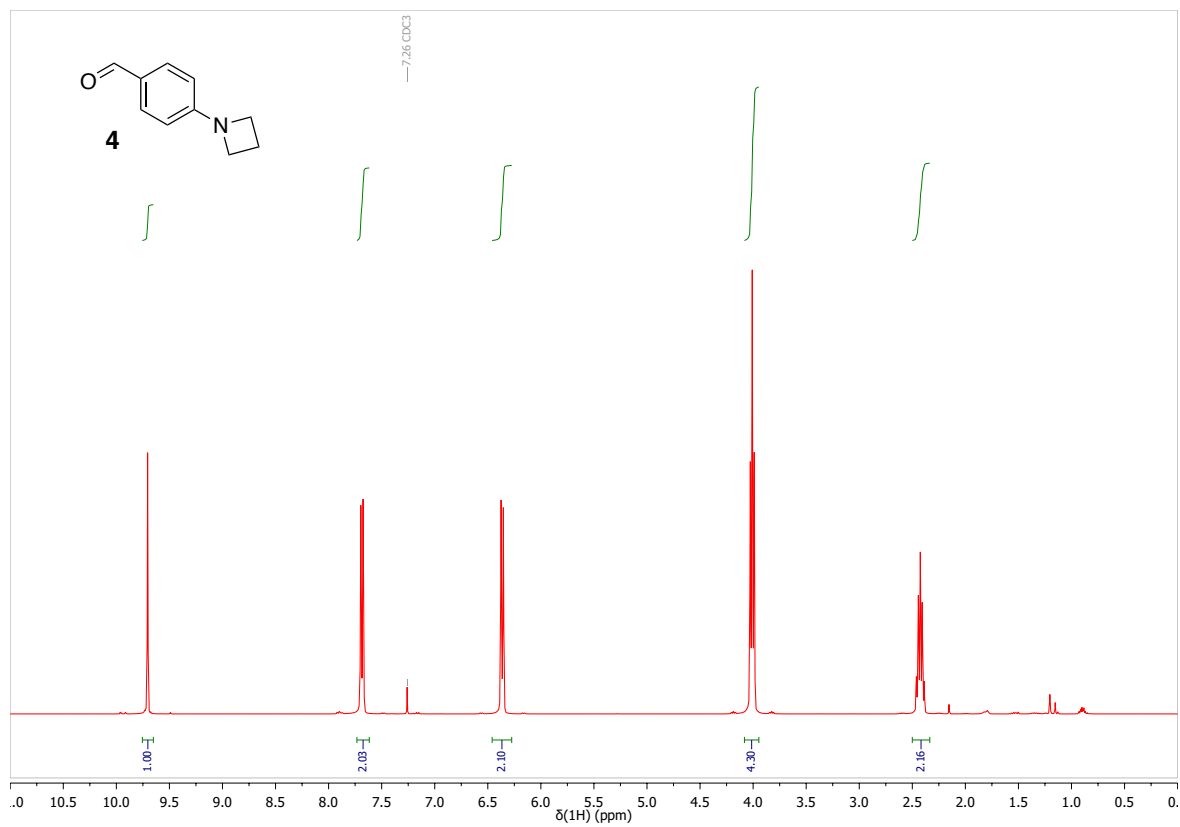

**Fig. SI 21.**  $^1\text{H}$  NMR spectrum of **4** (400 MHz,  $\text{CDCl}_3$ ).

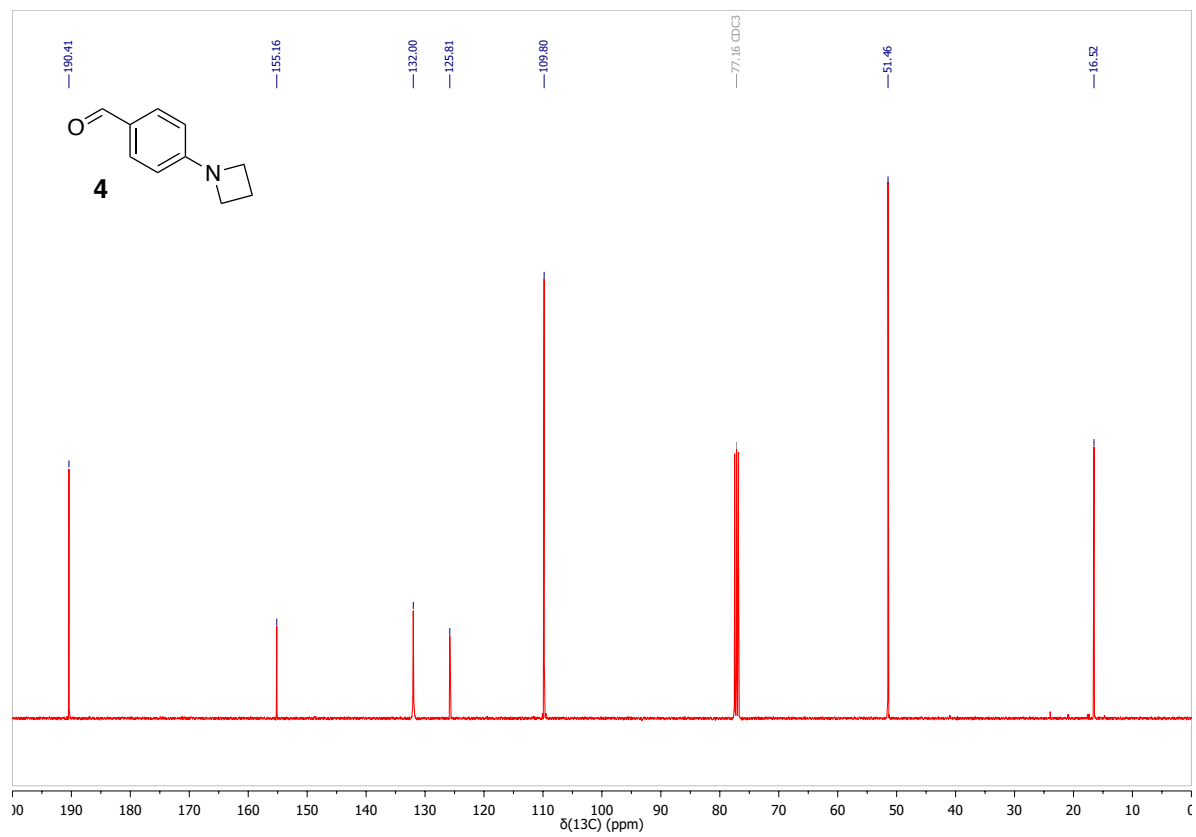

Fig. SI 22. <sup>13</sup>C NMR spectrum of **4** (101 MHz, CDCl<sub>3</sub>).

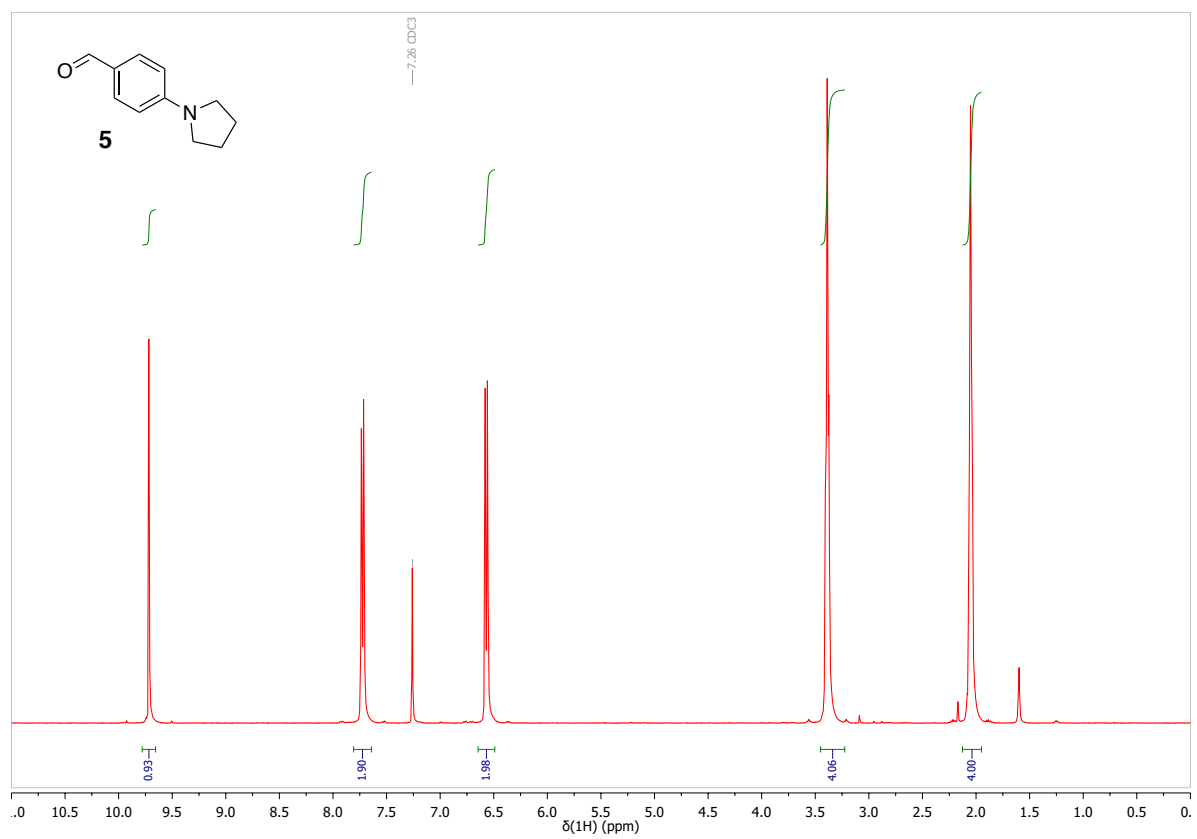

**Fig. SI 23.**  $^1\text{H}$  NMR spectrum of **5** (400 MHz,  $\text{CDCl}_3$ ).

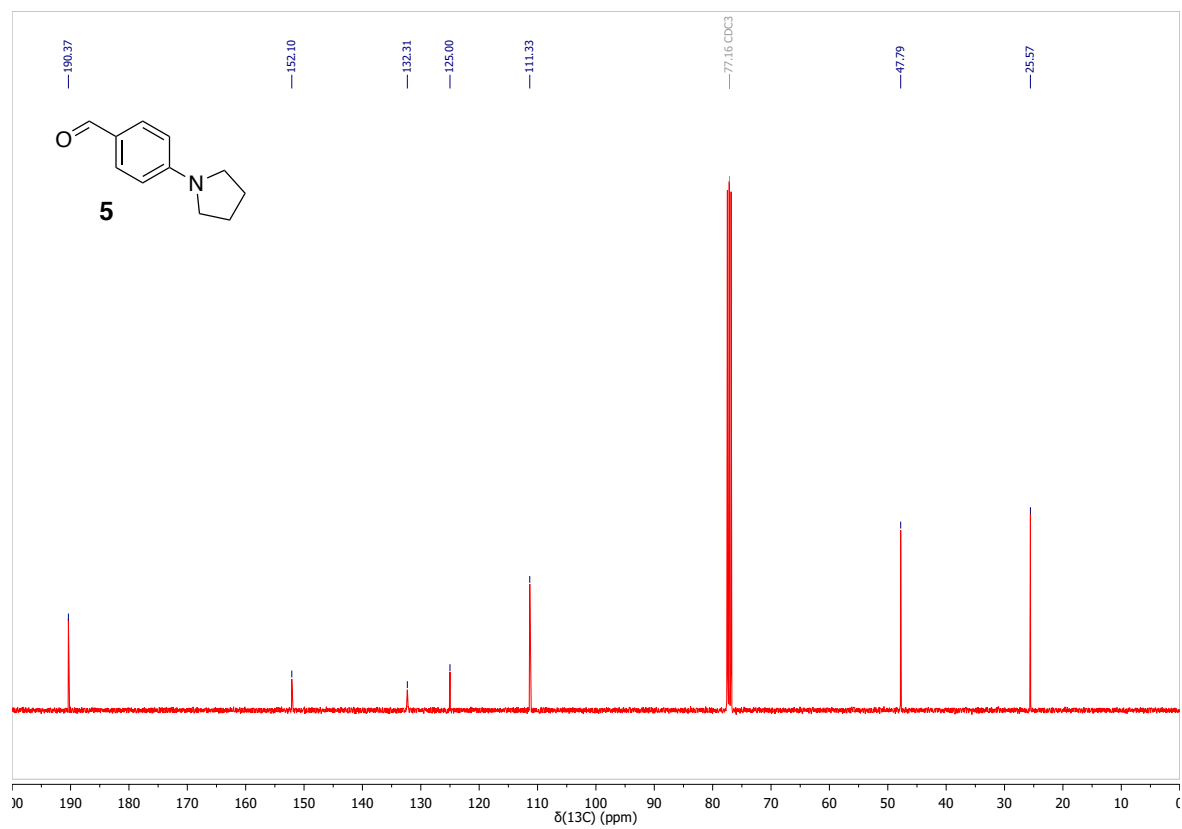

Fig. SI 24.  $^{13}\text{C}$  NMR spectrum of **5** (101 MHz,  $\text{CDCl}_3$ ).



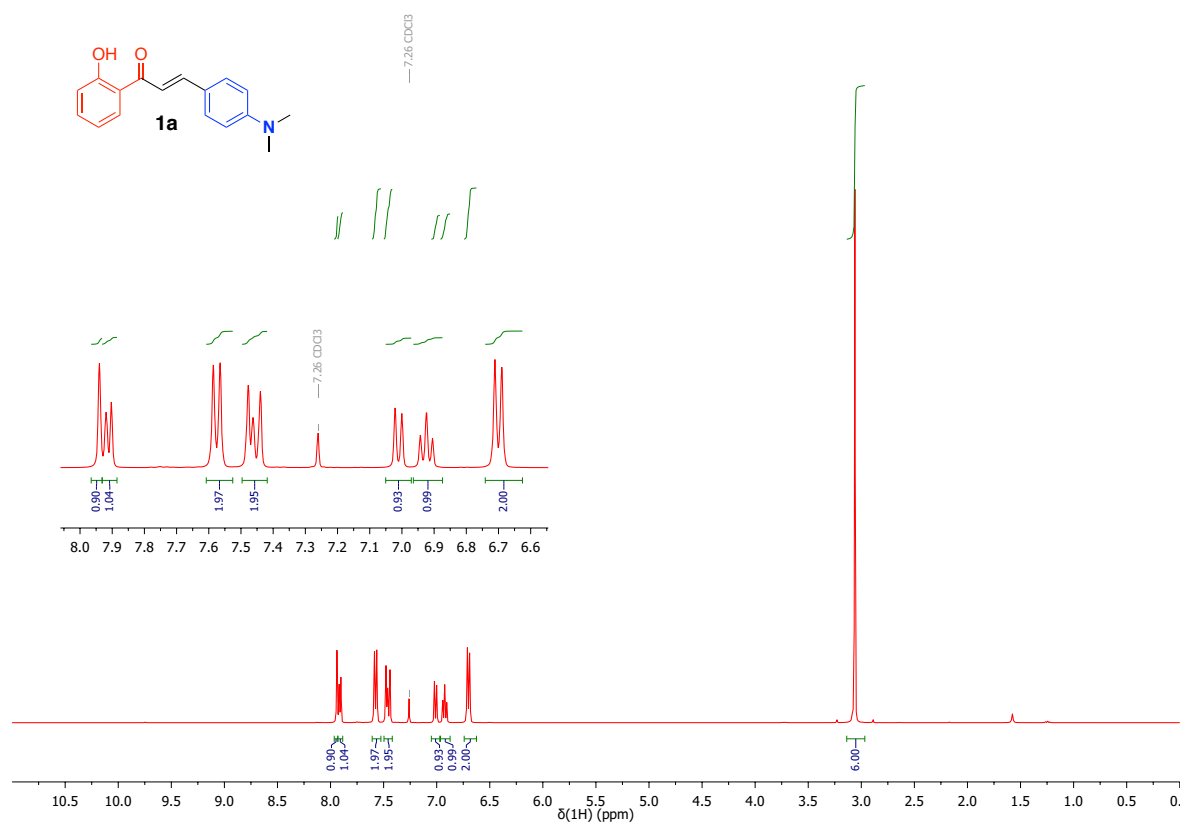

Fig. SI 25.  $^1\text{H}$  NMR spectrum of **1a** (400 MHz,  $\text{CDCl}_3$ ).

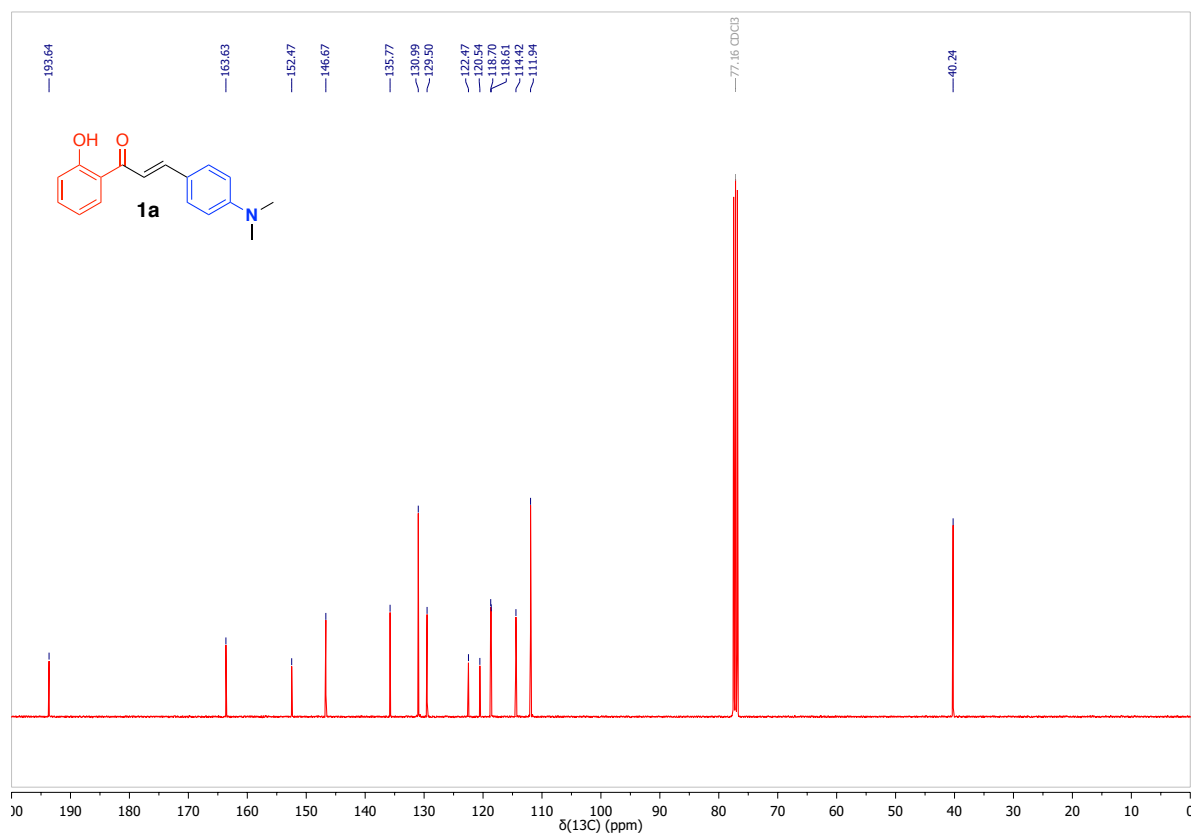

Fig. SI 26.  $^{13}\text{C}$  NMR spectrum of **1a** (101 MHz,  $\text{CDCl}_3$ ).

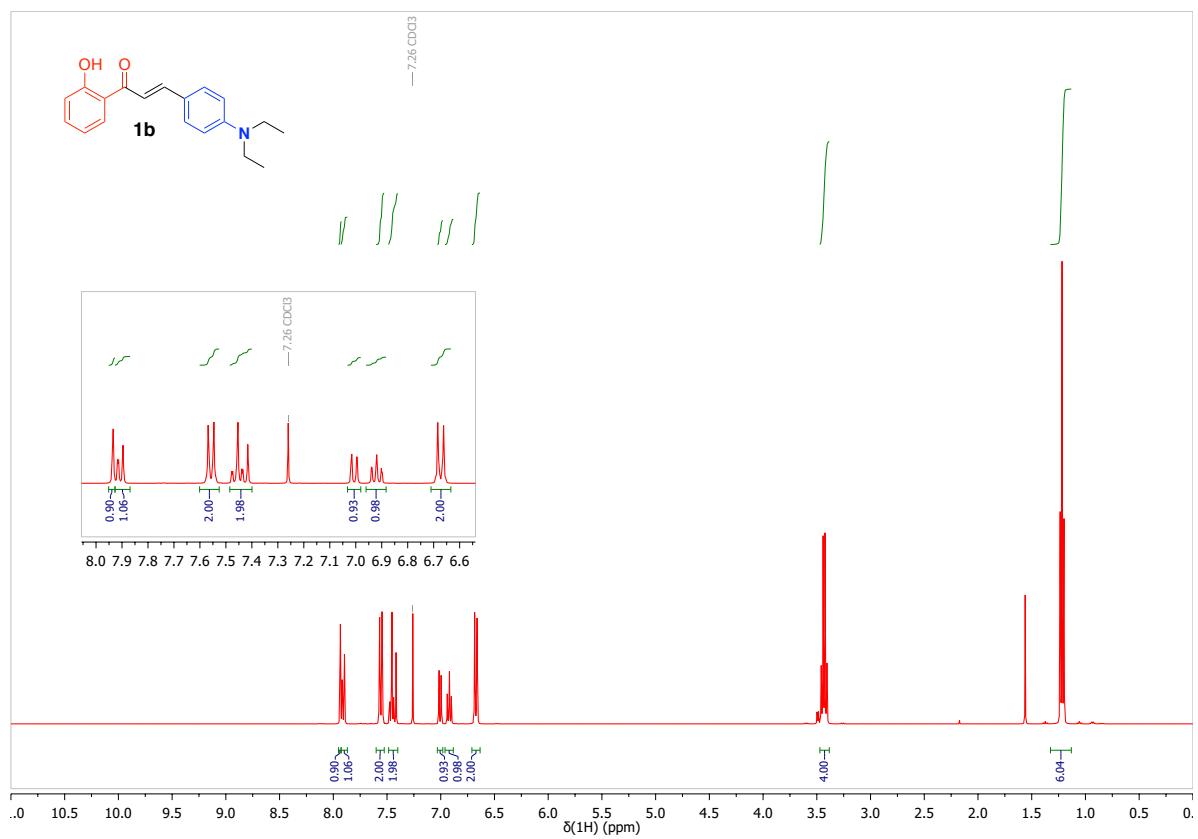

Fig. SI 27.  $^1\text{H}$  NMR spectrum of **1b** (400 MHz,  $\text{CDCl}_3$ ).

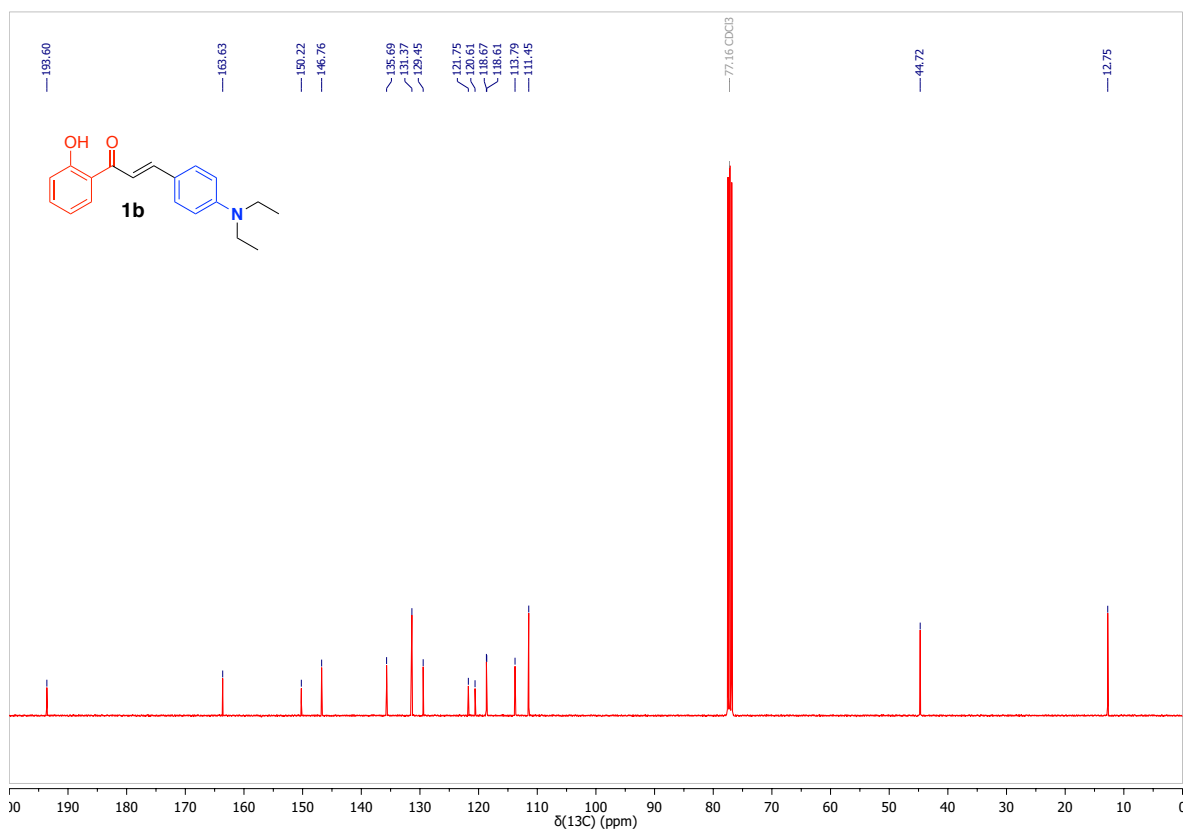

**Fig. SI 28.**  $^{13}\text{C}$  NMR spectrum of **1b** (101 MHz,  $\text{CDCl}_3$ ).

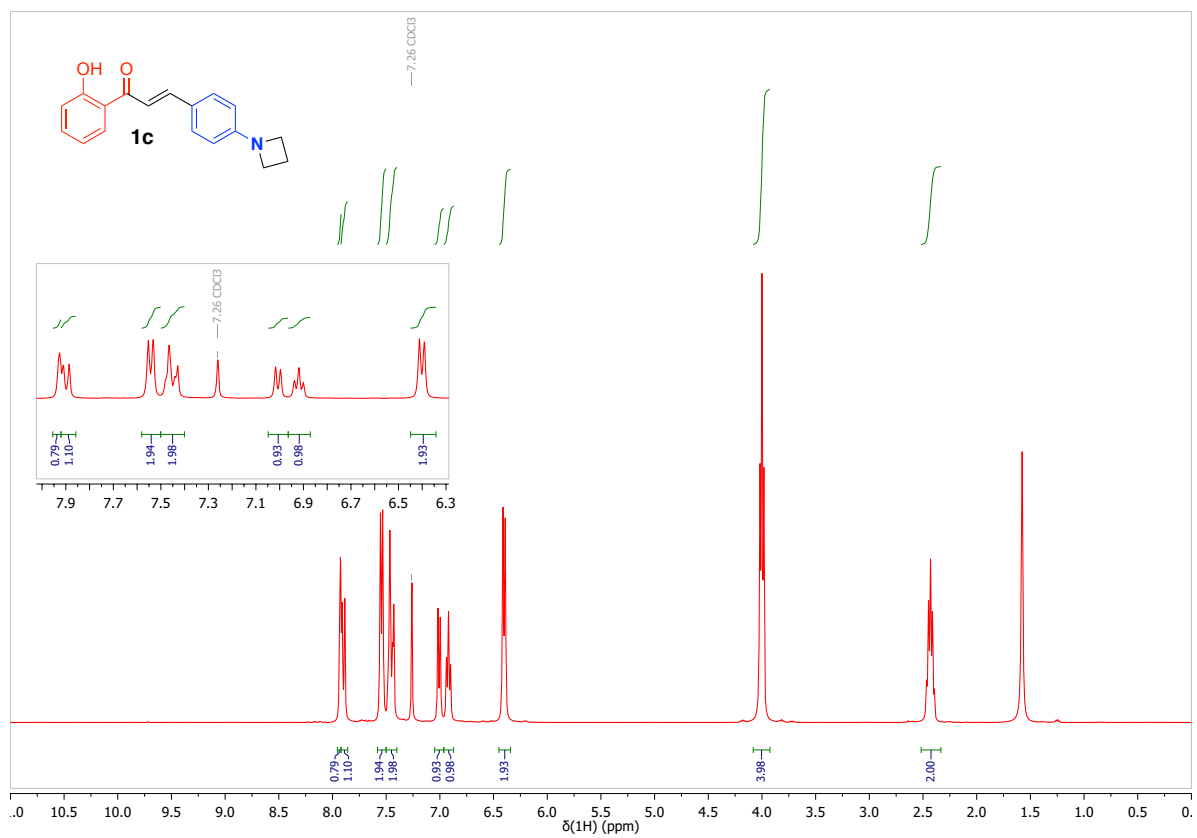

**Fig. SI 29.**  $^1\text{H}$  NMR spectrum of **1c** (400 MHz,  $\text{CDCl}_3$ ).

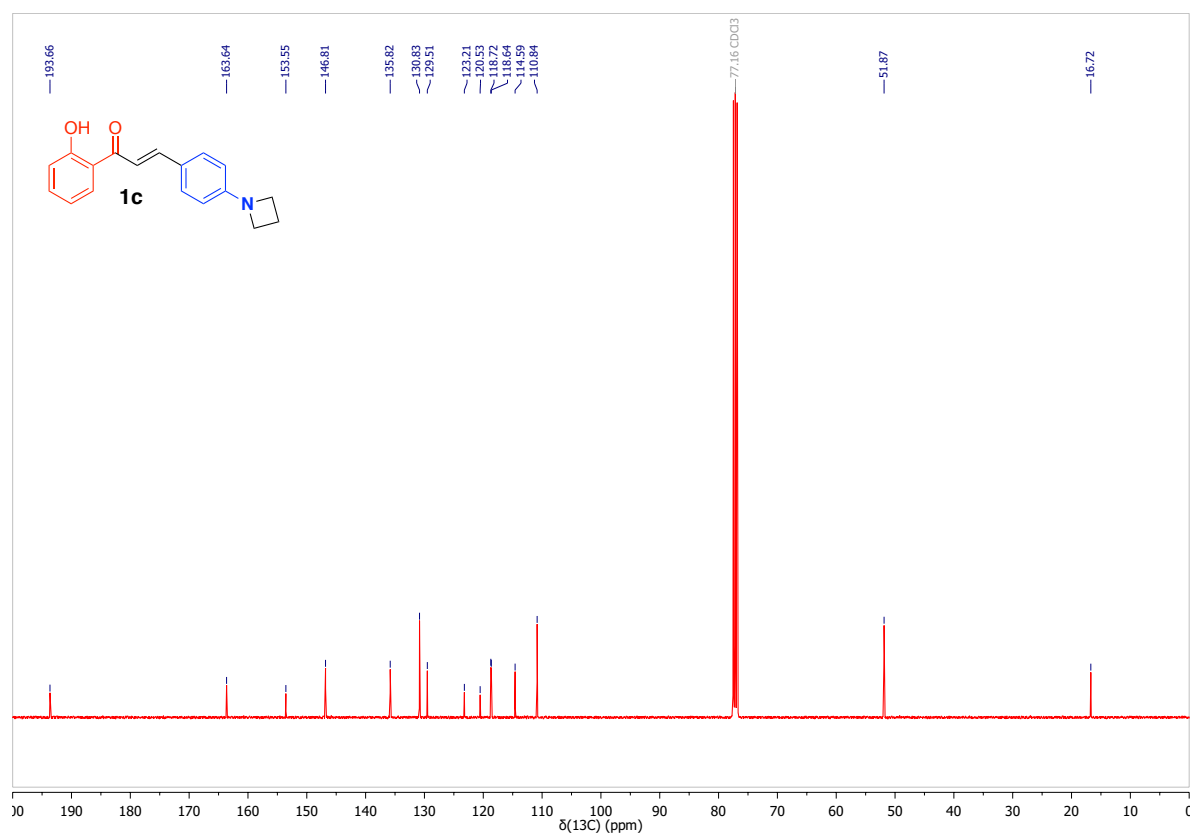

**Fig. SI 30.**  $^{13}\text{C}$  NMR spectrum of **1c** (101 MHz,  $\text{CDCl}_3$ ).

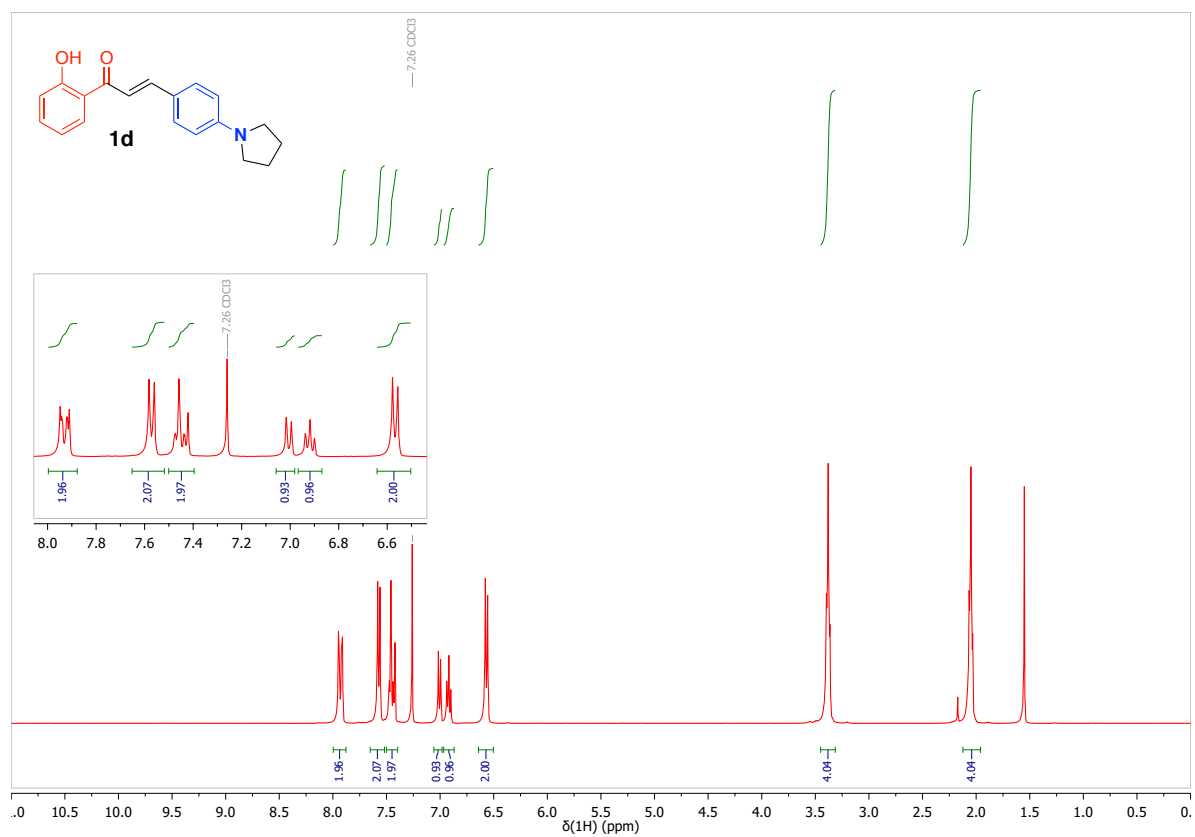

**Fig. SI 31.**  $^1\text{H}$  NMR spectrum of **1d** (400 MHz,  $\text{CDCl}_3$ ).

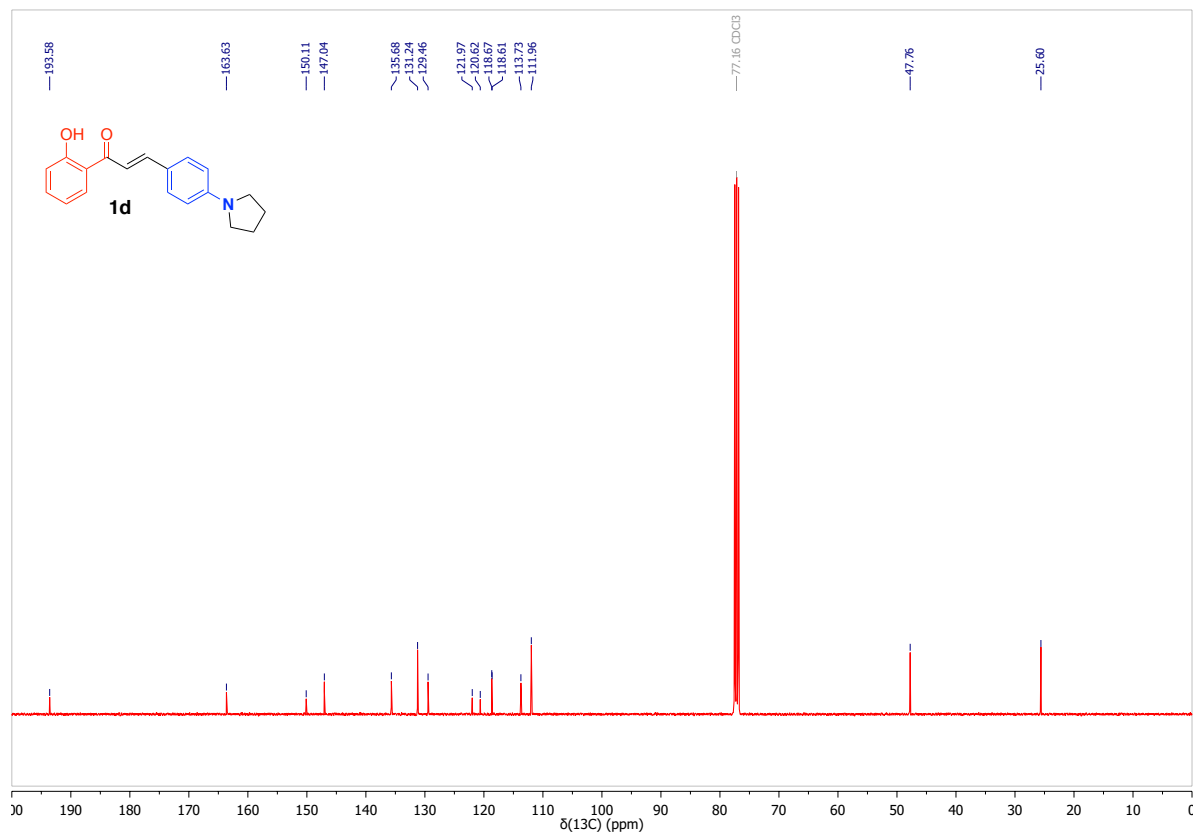

Fig. SI 32.  $^{13}\text{C}$  NMR spectrum of **1d** (101 MHz,  $\text{CDCl}_3$ ).



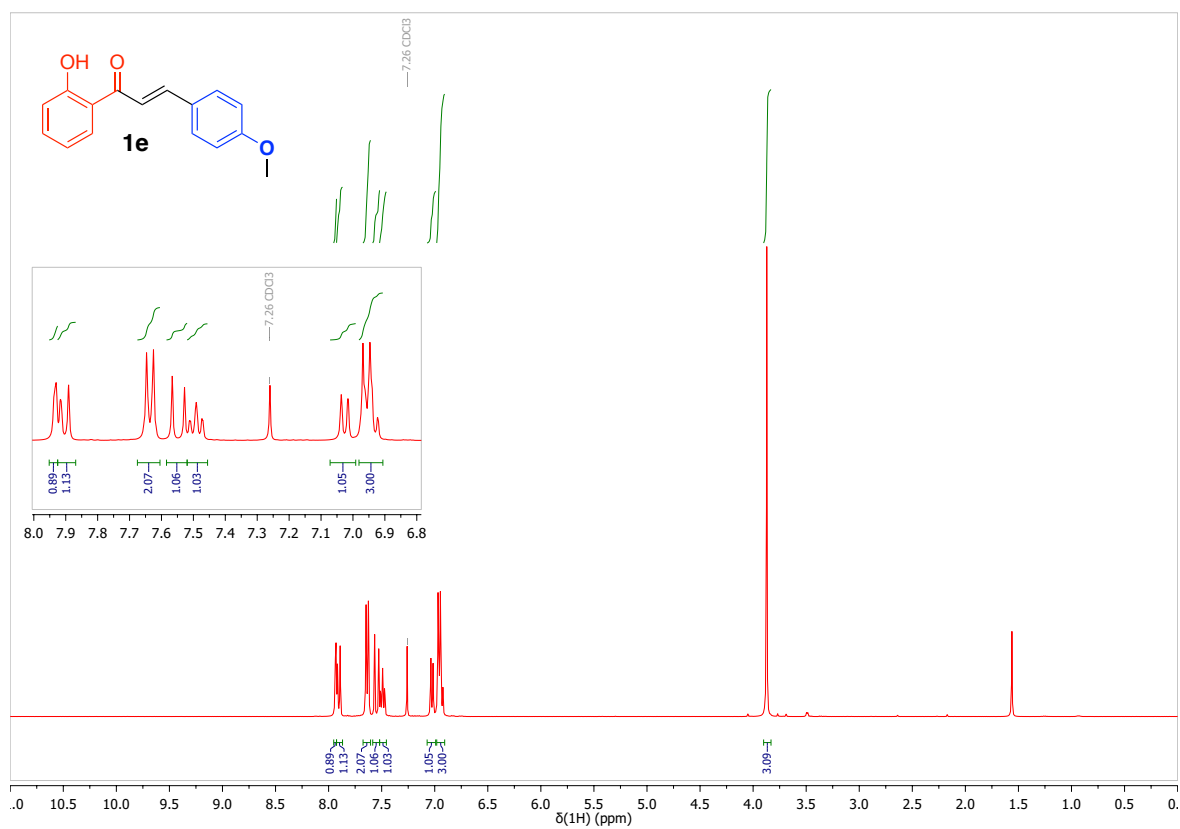

**Fig. SI 33.**  $^1\text{H}$  NMR spectrum of **1e** (400 MHz,  $\text{CDCl}_3$ ).

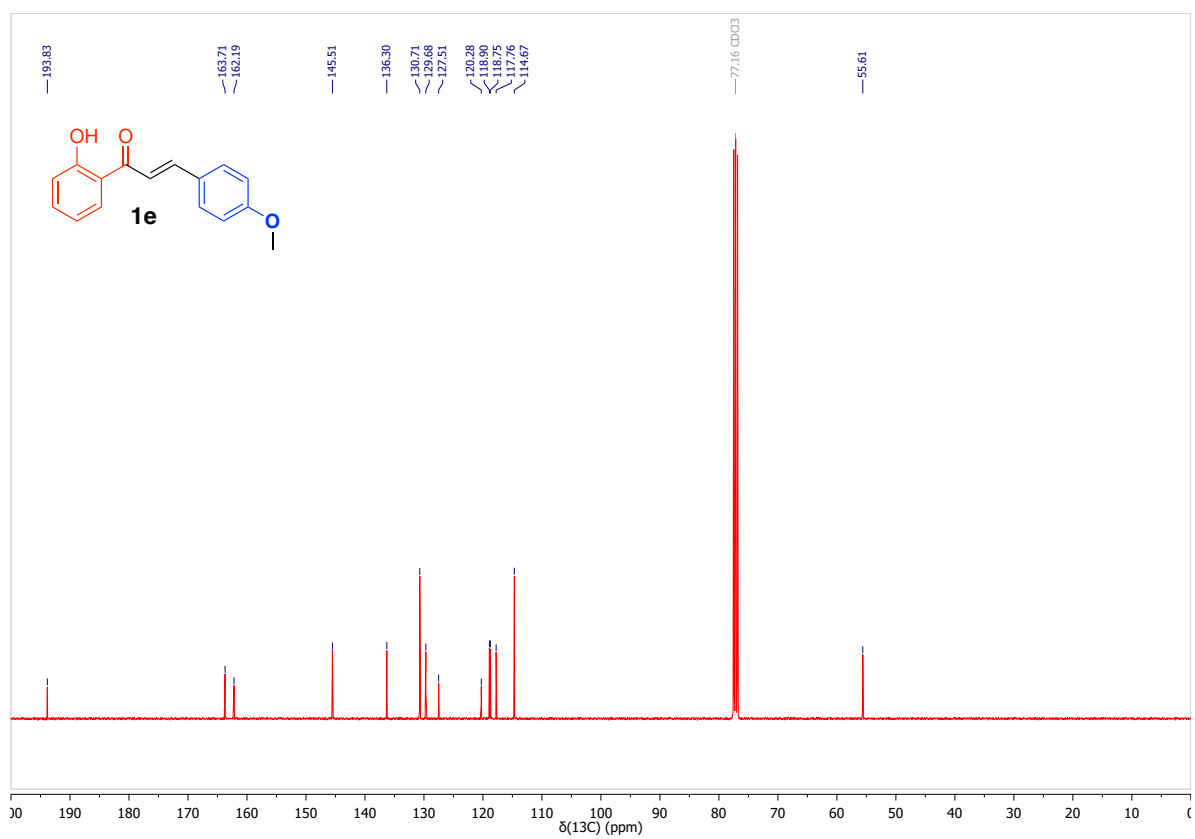

**Fig. SI 34.**  $^{13}\text{C}$  NMR spectrum of **1e** (101 MHz,  $\text{CDCl}_3$ ).

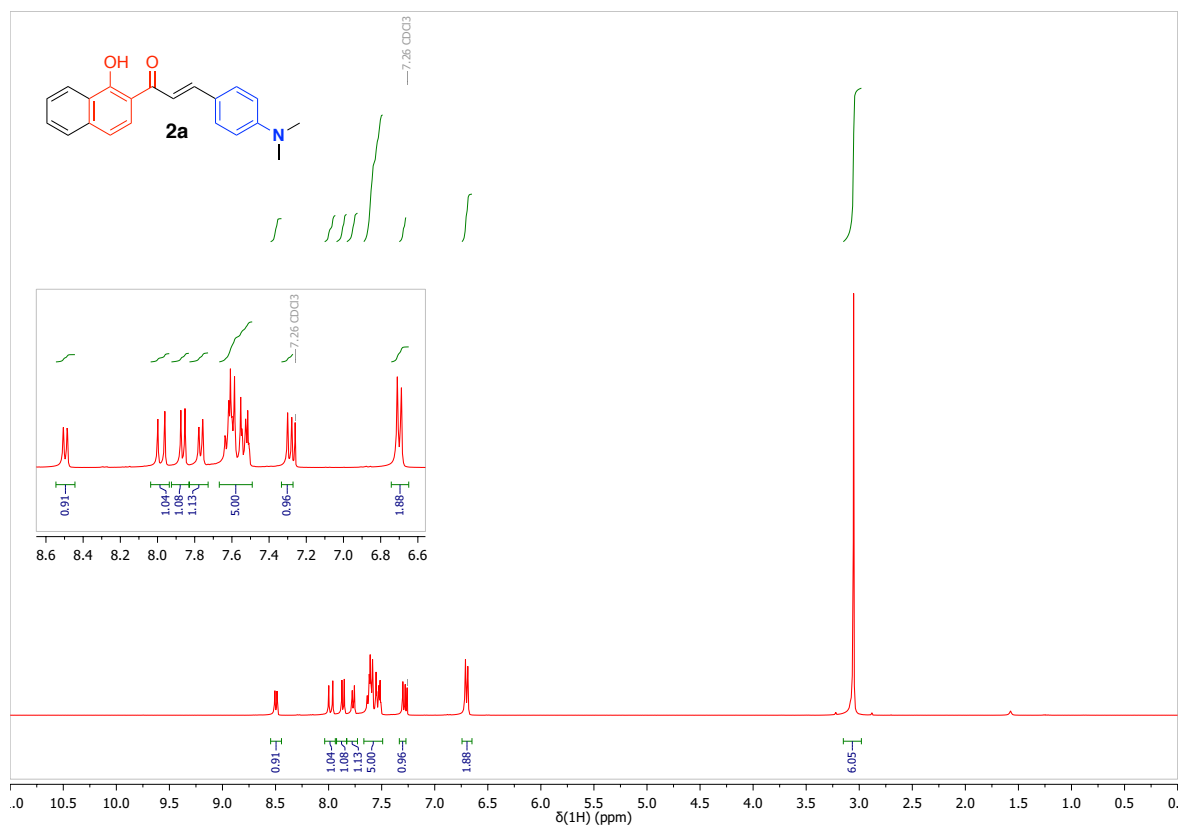

**Fig. SI 35.**  $^1\text{H}$  NMR spectrum of **2a** (400 MHz,  $\text{CDCl}_3$ ).

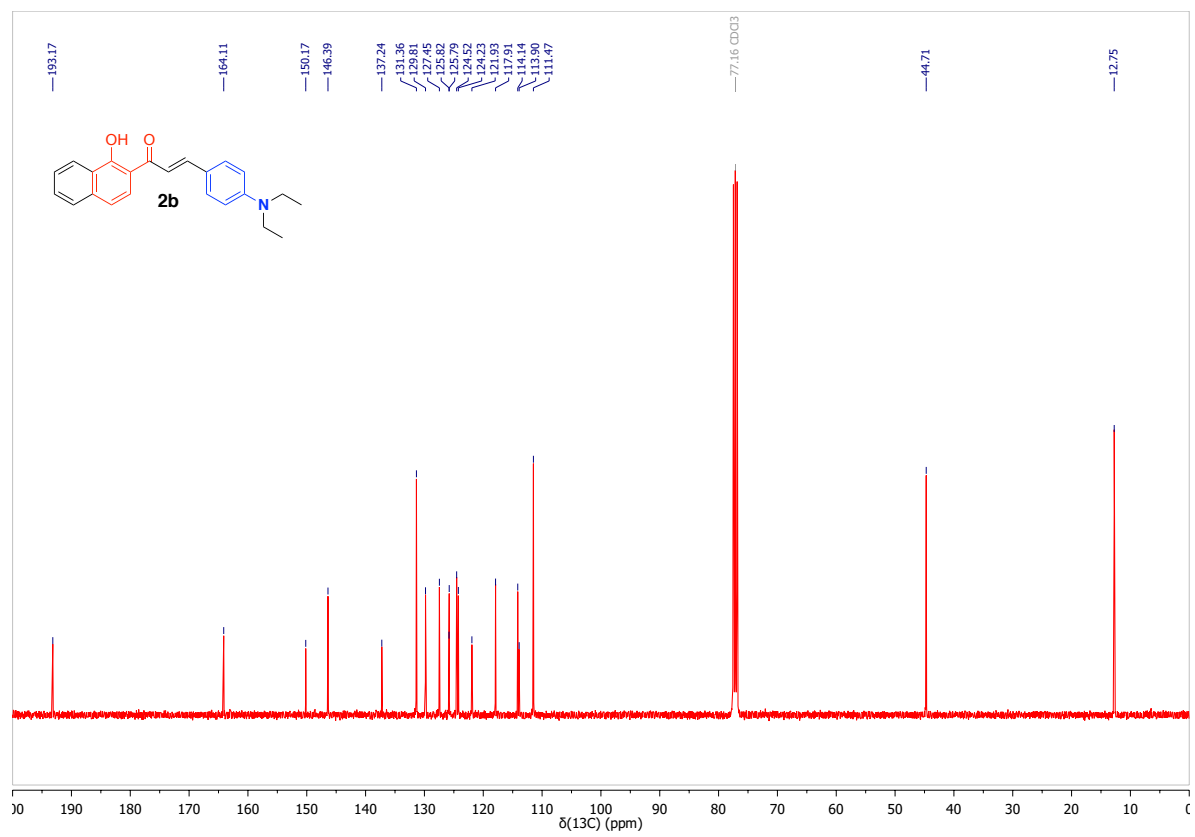

**Fig. SI 36.**  $^{13}\text{C}$  NMR spectrum of **2a** (101 MHz,  $\text{CDCl}_3$ ).

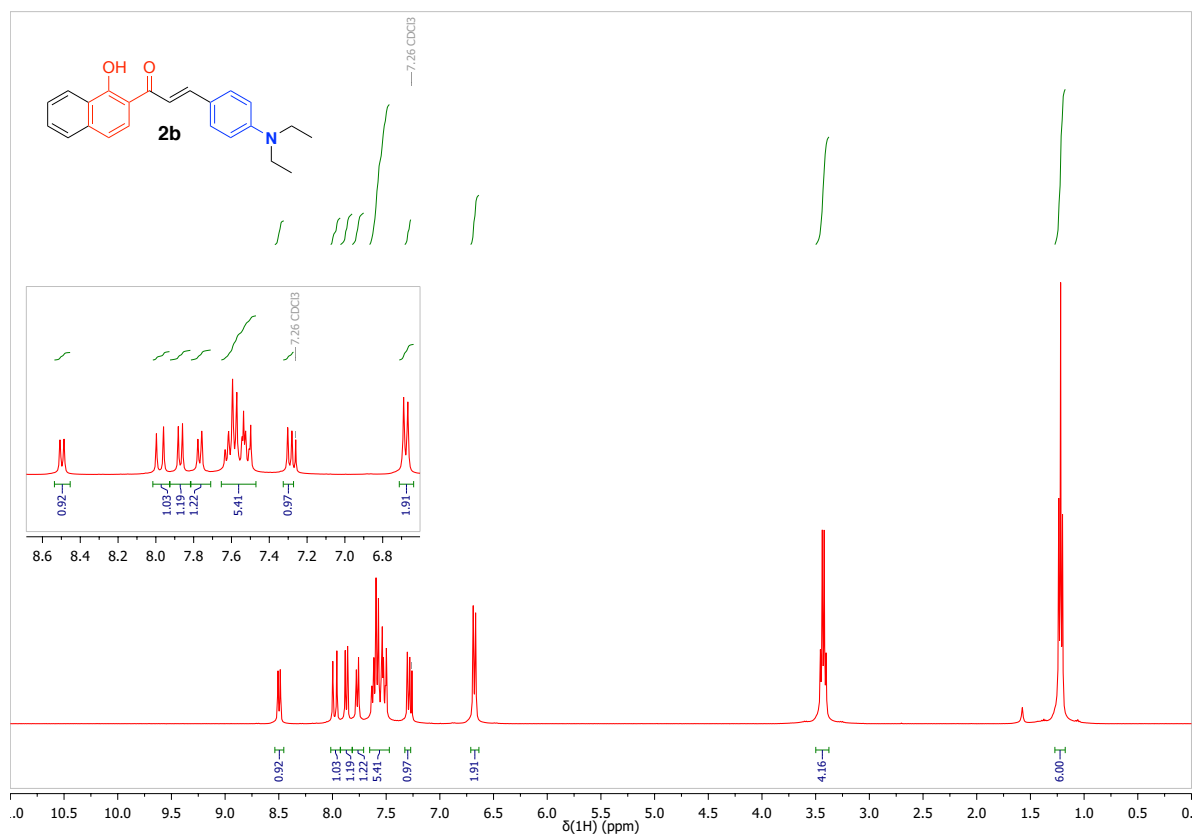

**Fig. SI 37.**  $^1\text{H}$  NMR spectrum of **2b** (400 MHz,  $\text{CDCl}_3$ ).



Fig. SI 38.  $^{13}\text{C}$  NMR spectrum of **2b** (101 MHz,  $\text{CDCl}_3$ ).

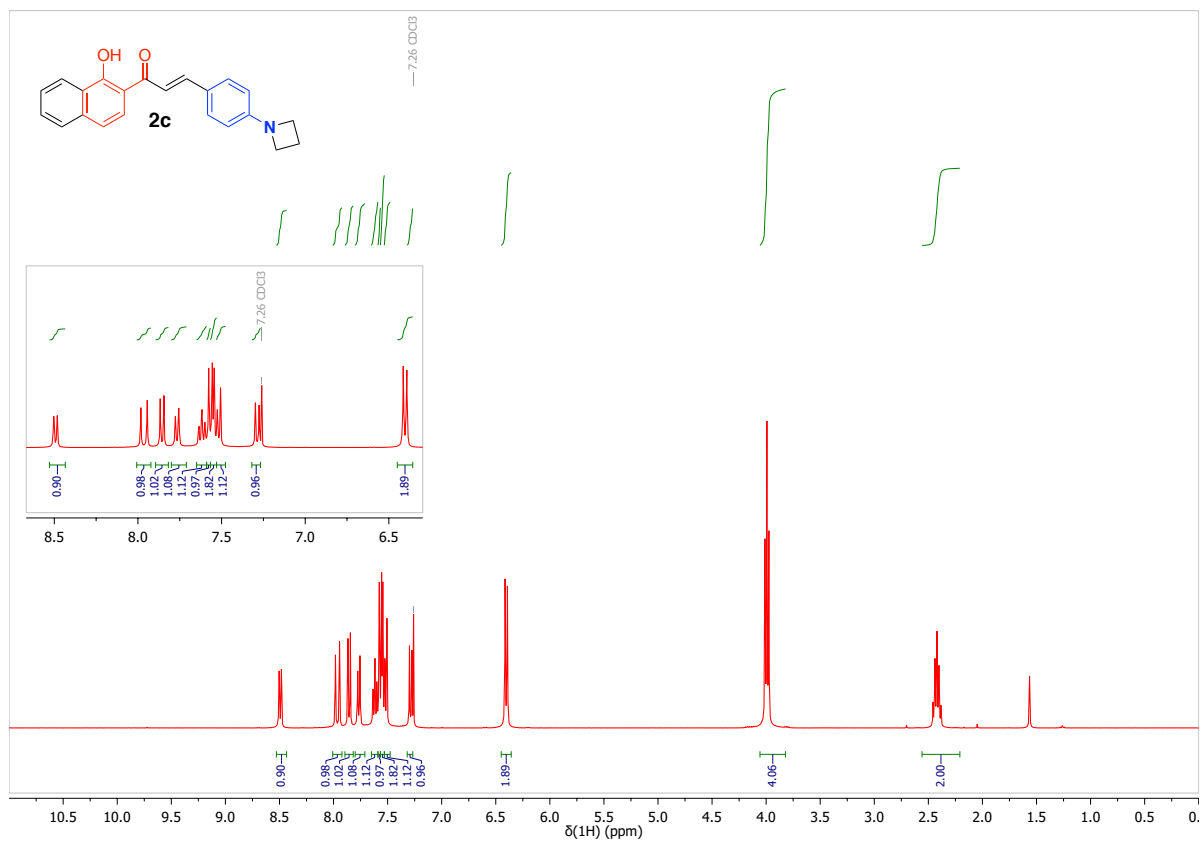

**Fig. SI 39.** <sup>1</sup>H NMR spectrum of **2c** (400 MHz, CDCl<sub>3</sub>).

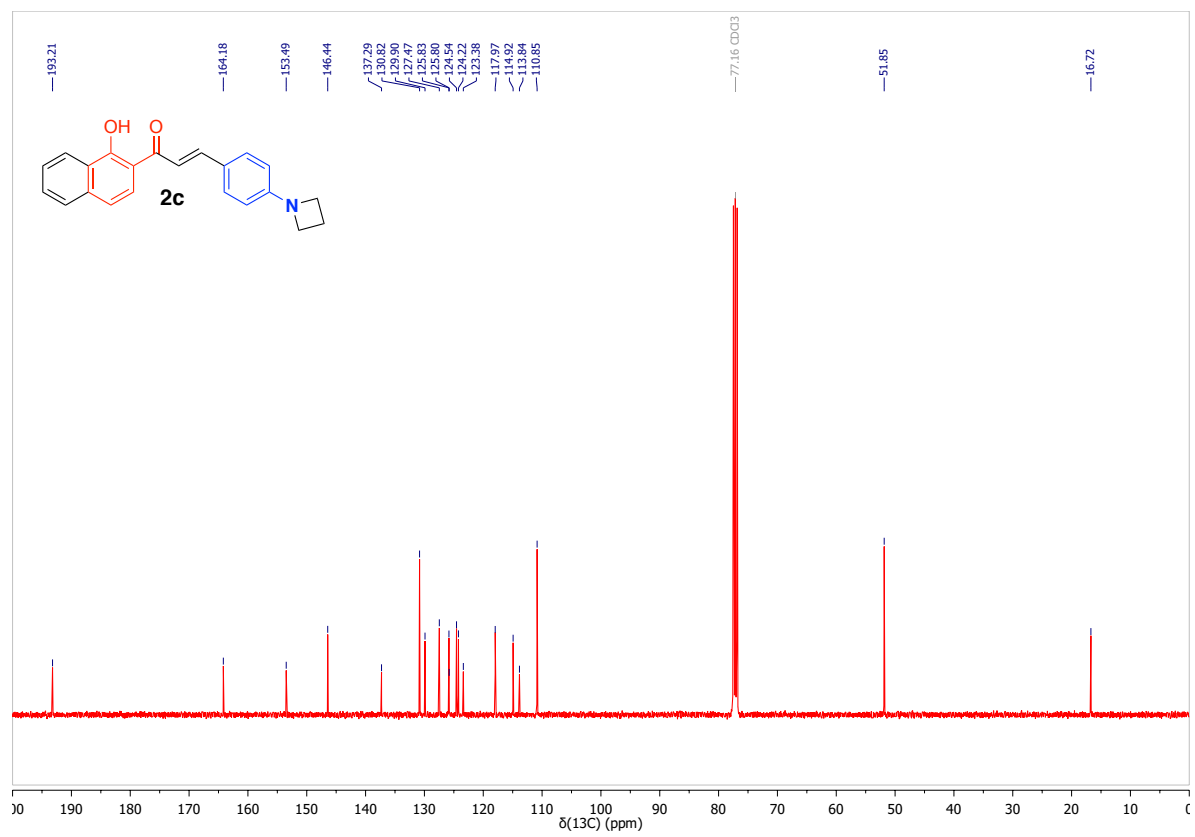

**Fig. SI 40.**  $^{13}\text{C}$  NMR spectrum of **2c** (101 MHz,  $\text{CDCl}_3$ ).



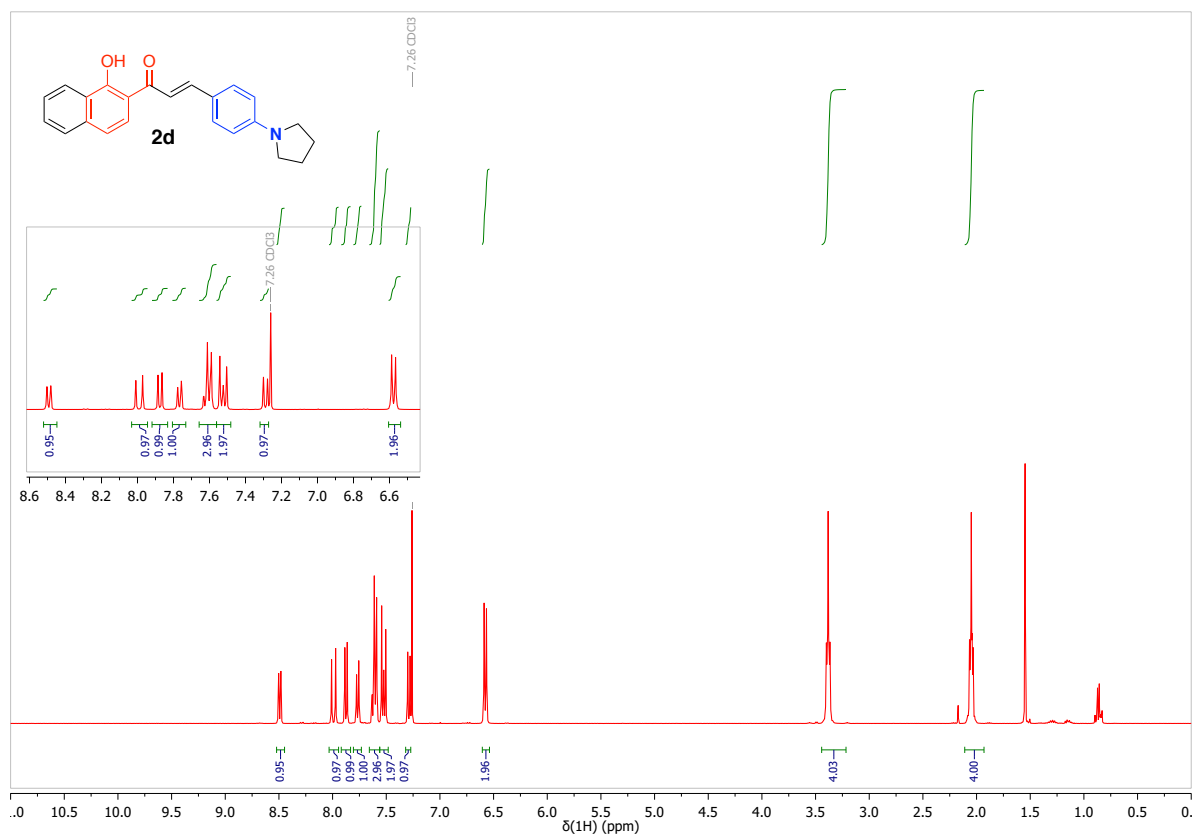

**Fig. SI 41.**  $^1\text{H}$  NMR spectrum of **2d** (400 MHz,  $\text{CDCl}_3$ ).

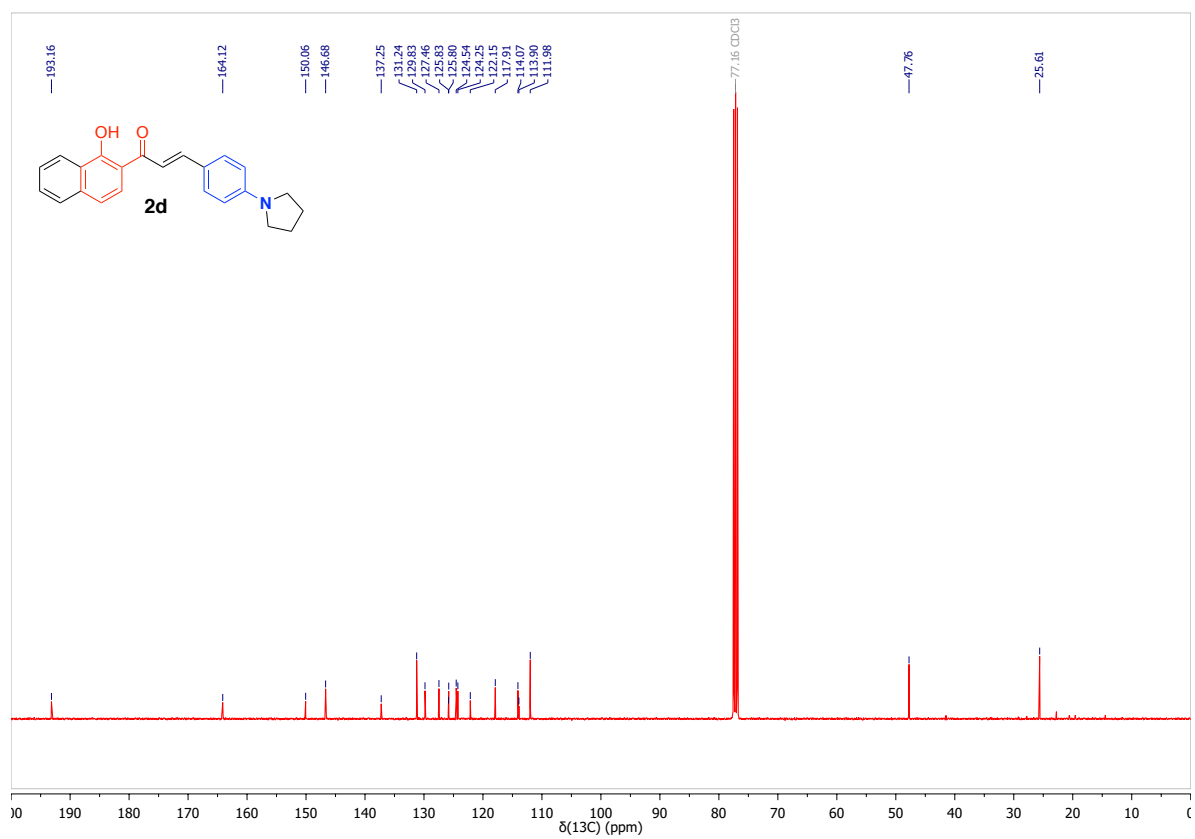

**Fig. SI 42.**  $^{13}\text{C}$  NMR spectrum of **2d** (101 MHz,  $\text{CDCl}_3$ ).

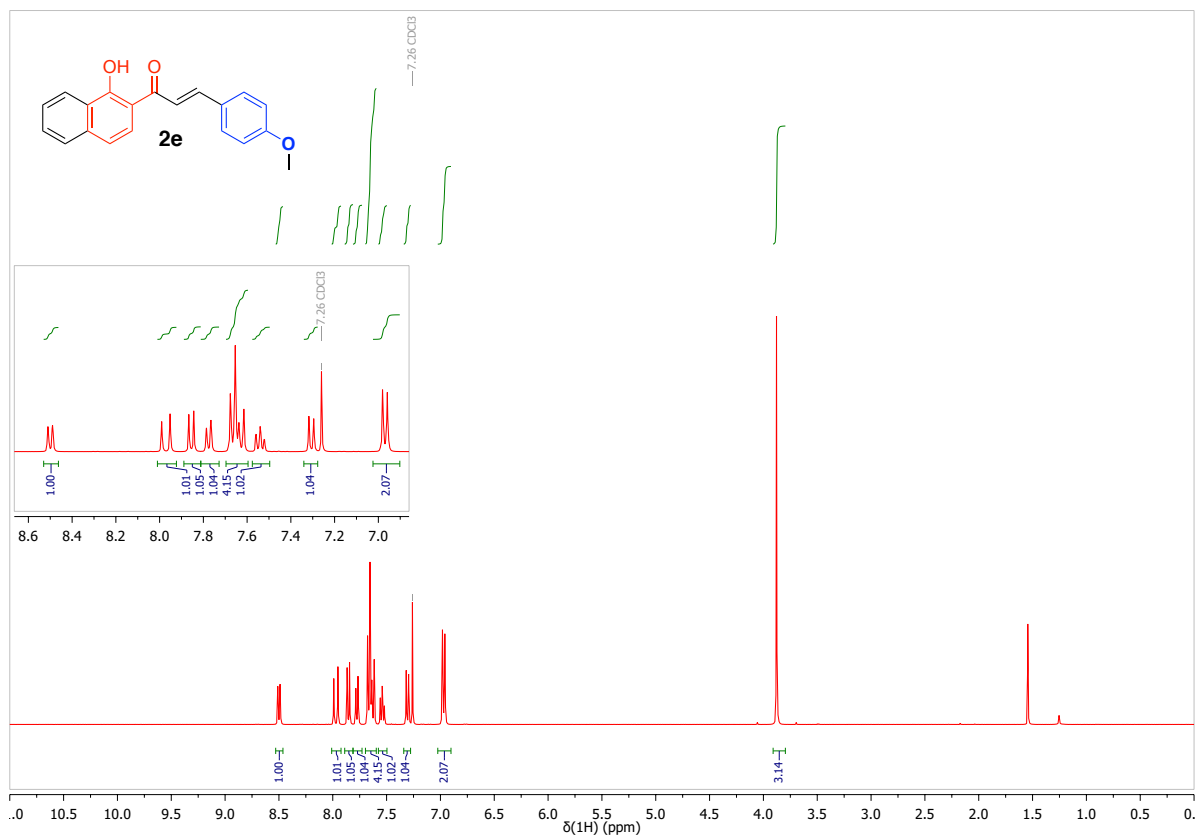

**Fig. SI 43.**  $^1\text{H}$  NMR spectrum of **2e** (400 MHz,  $\text{CDCl}_3$ ).

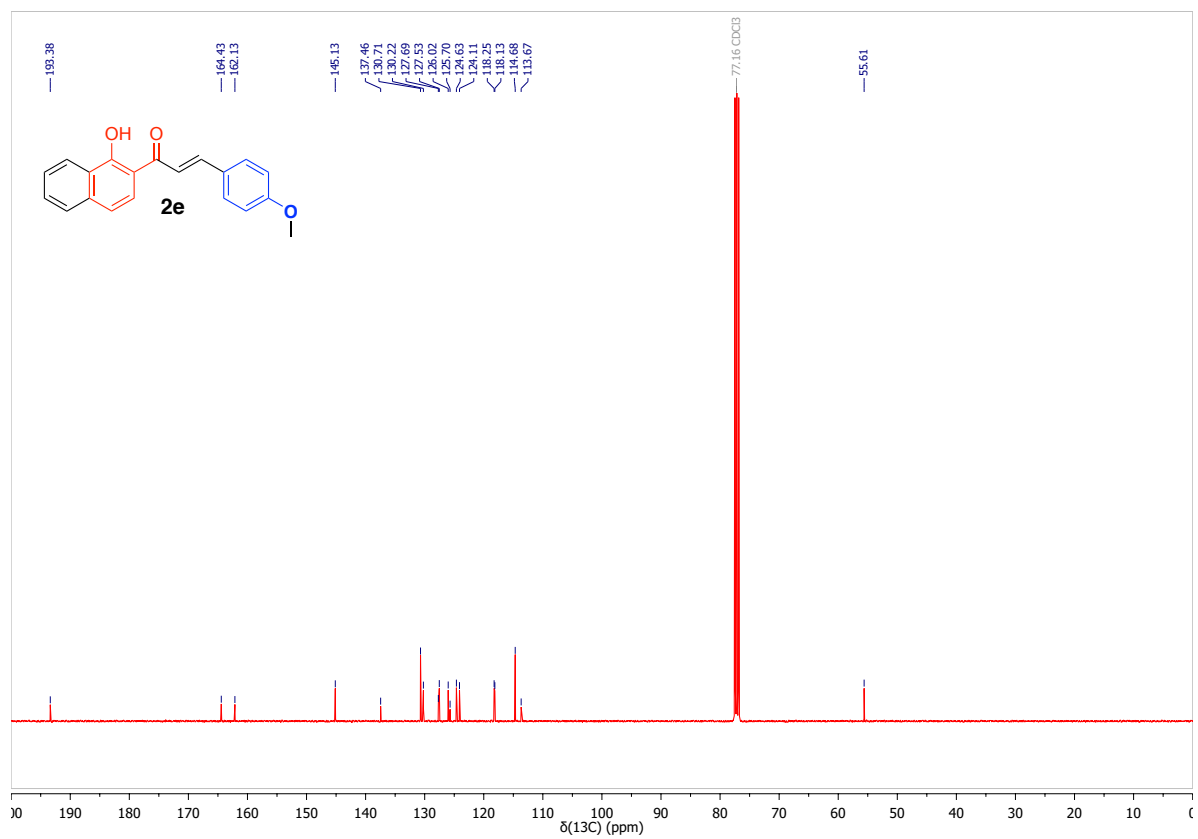

**Fig. SI 44.**  $^{13}\text{C}$  NMR spectrum of **2e** (101 MHz,  $\text{CDCl}_3$ ).

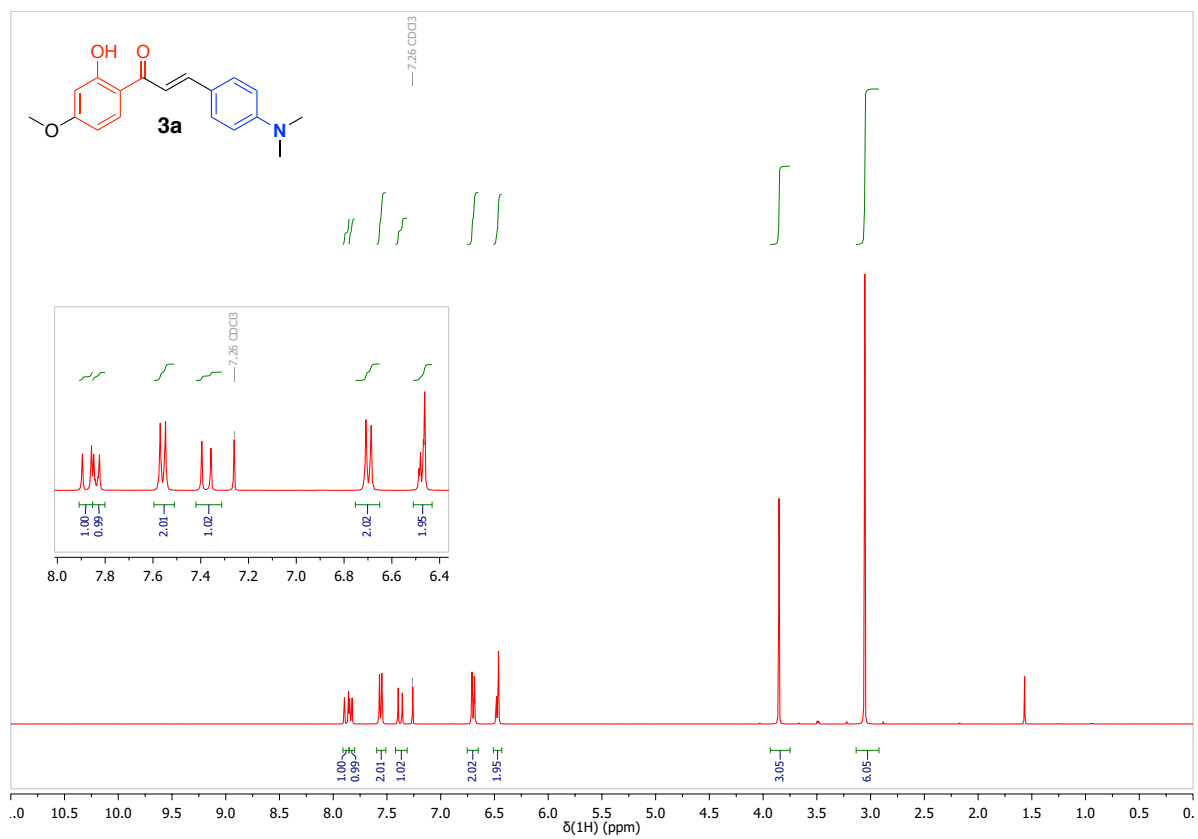

**Fig. SI 45.**  $^1\text{H}$  NMR spectrum of **3a** (400 MHz,  $\text{CDCl}_3$ ).

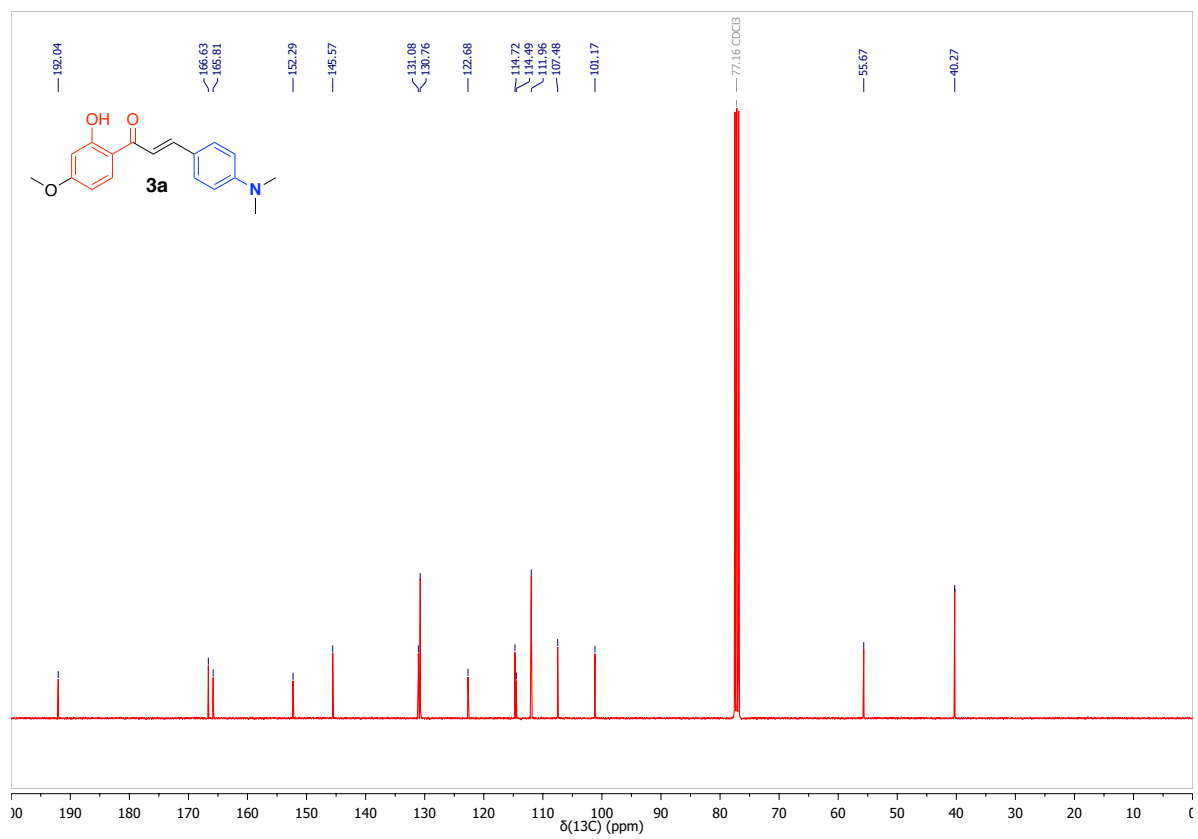

**Fig. SI 46.**  $^{13}\text{C}$  NMR spectrum of **3a** (101 MHz,  $\text{CDCl}_3$ ).

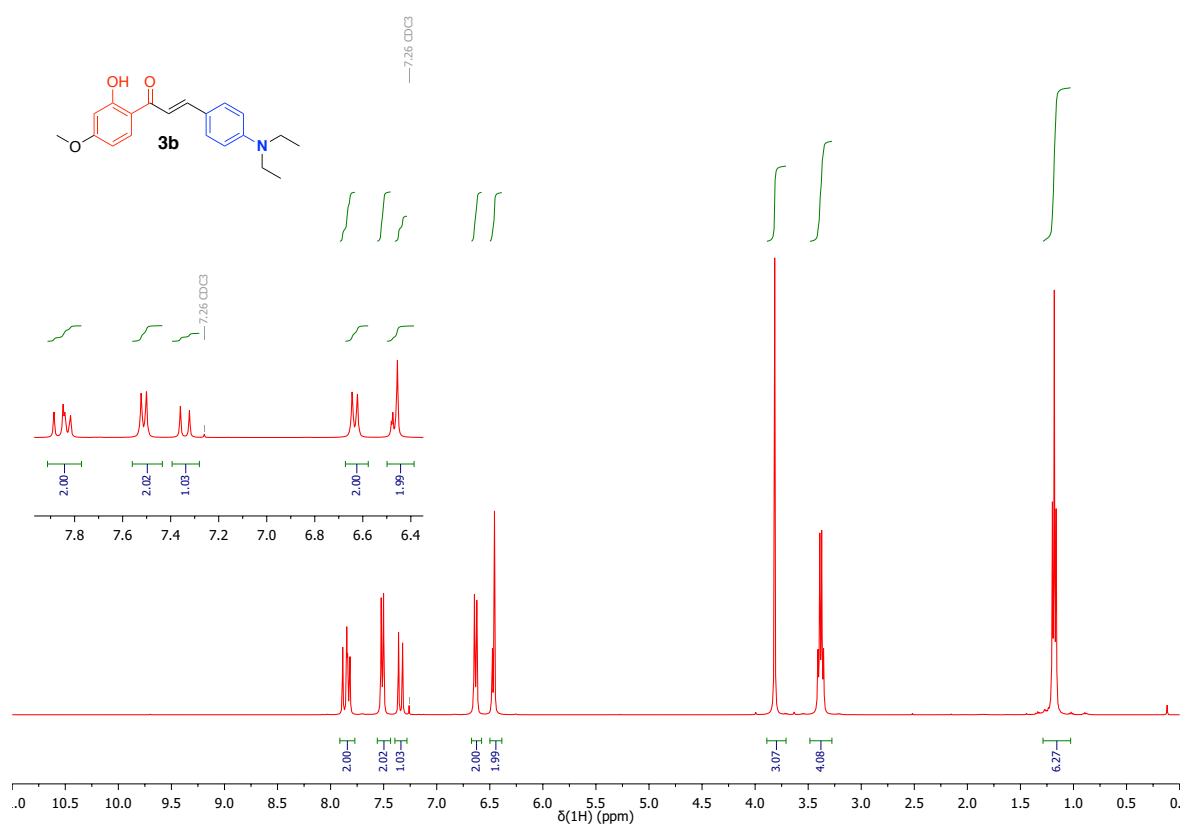

**Fig. SI 47.**  $^1\text{H}$  NMR spectrum of **3b** (400 MHz,  $\text{CDCl}_3$ ).

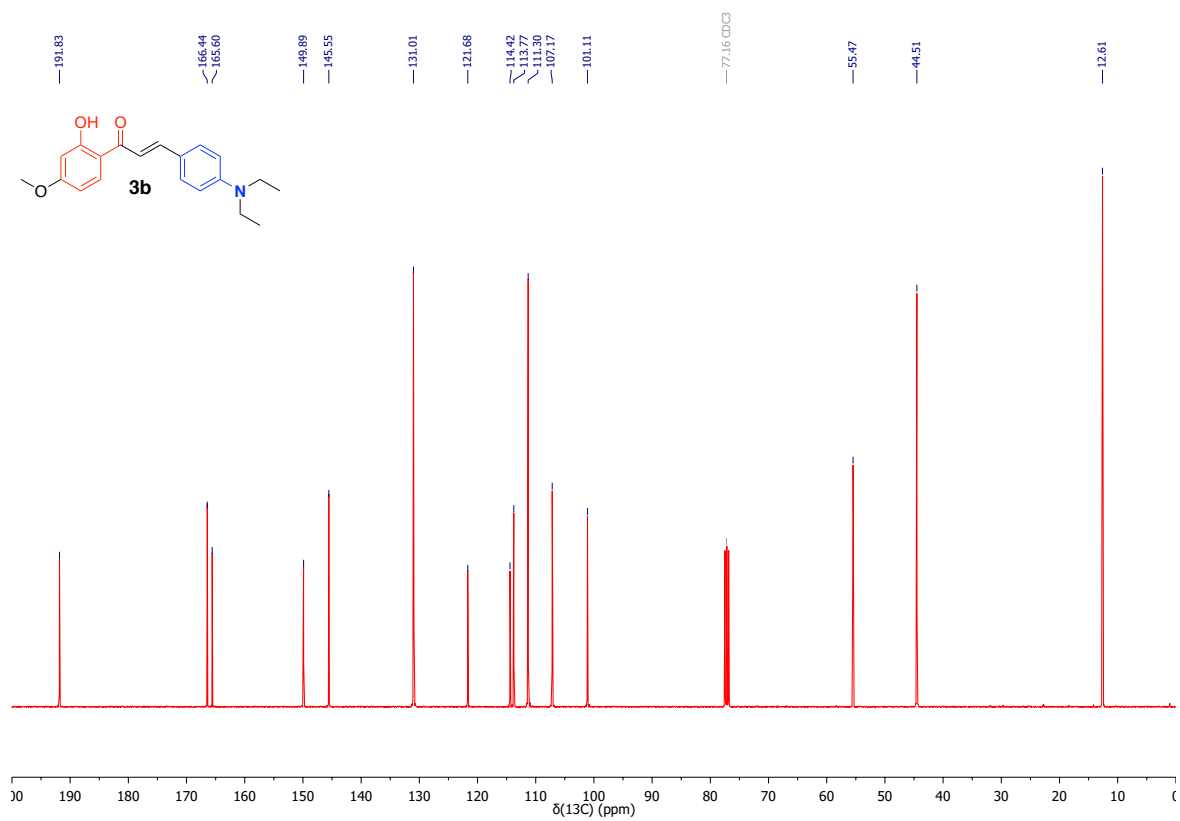

**Fig. SI 48.**  $^{13}\text{C}$  NMR spectrum of **3b** (101 MHz,  $\text{CDCl}_3$ ).



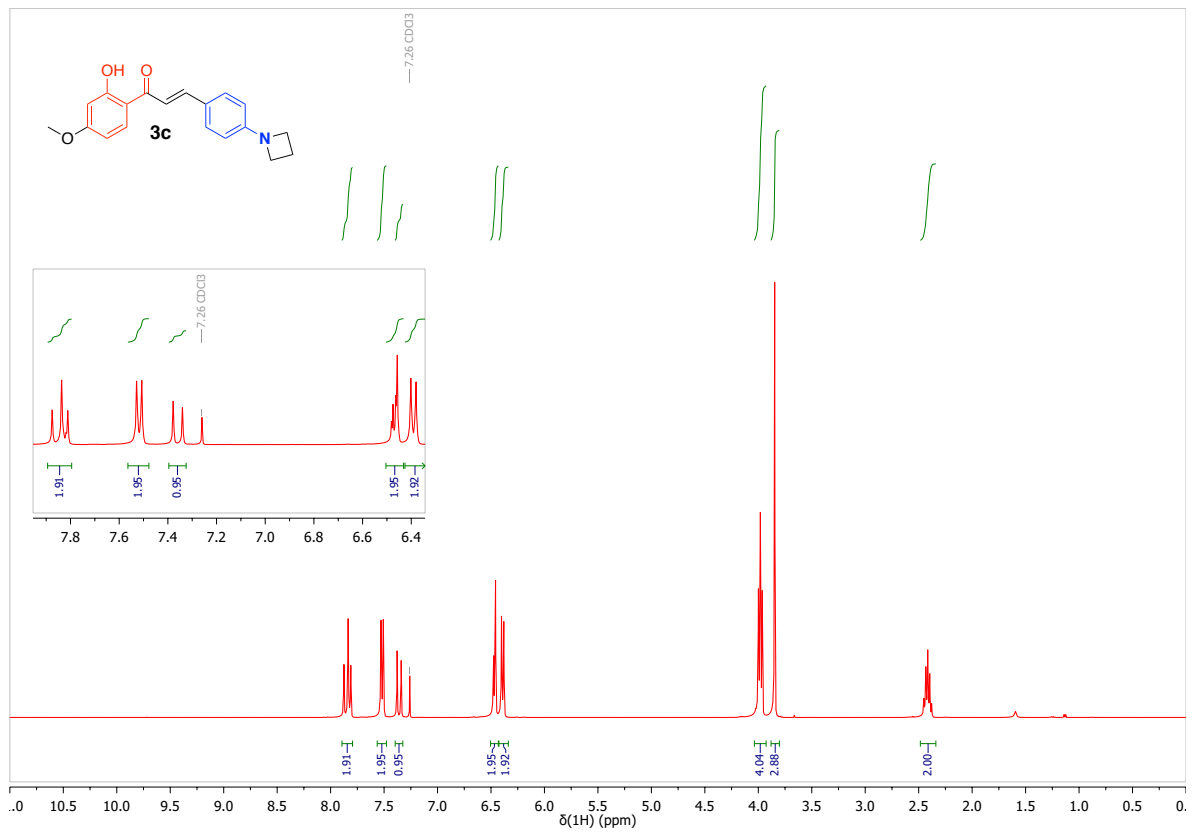

**Fig. SI 49.**  $^1\text{H}$  NMR spectrum of **3c** (400 MHz,  $\text{CDCl}_3$ ).

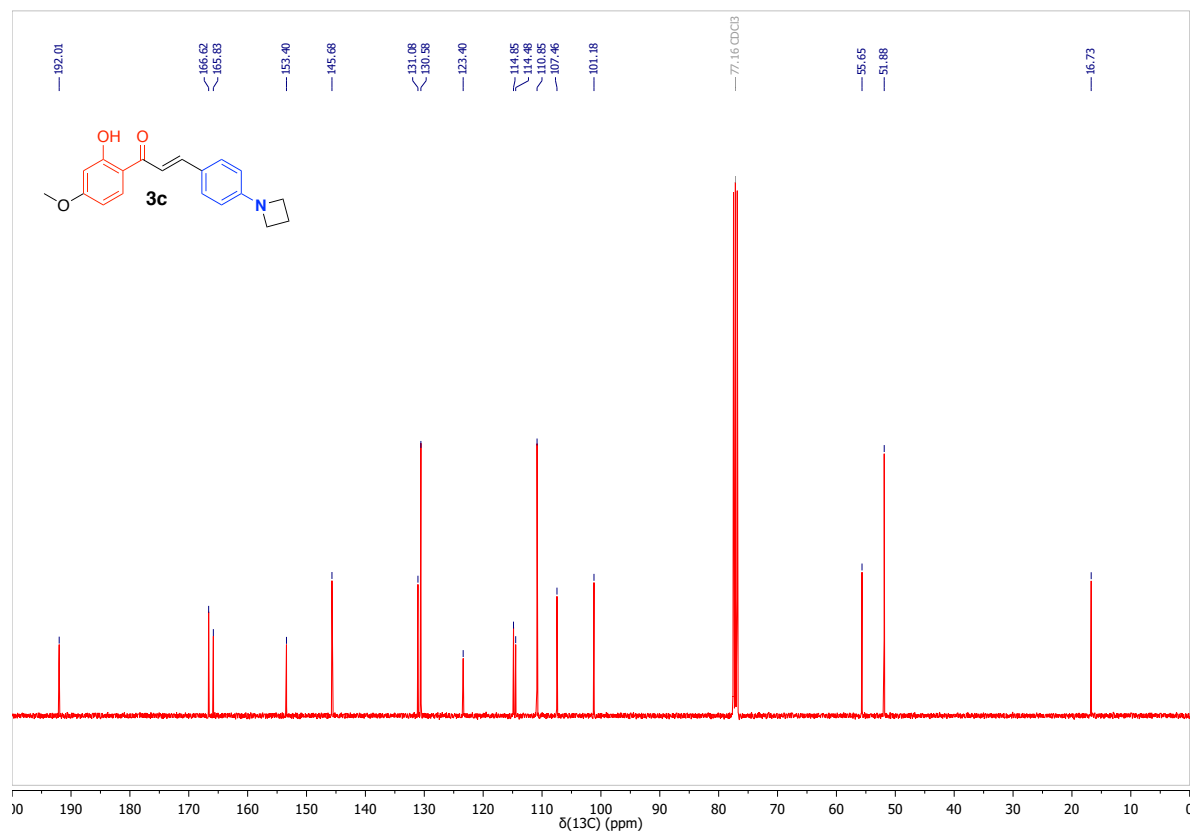

Fig. SI 50.  $^{13}\text{C}$  NMR spectrum of **3c** (101 MHz,  $\text{CDCl}_3$ ).

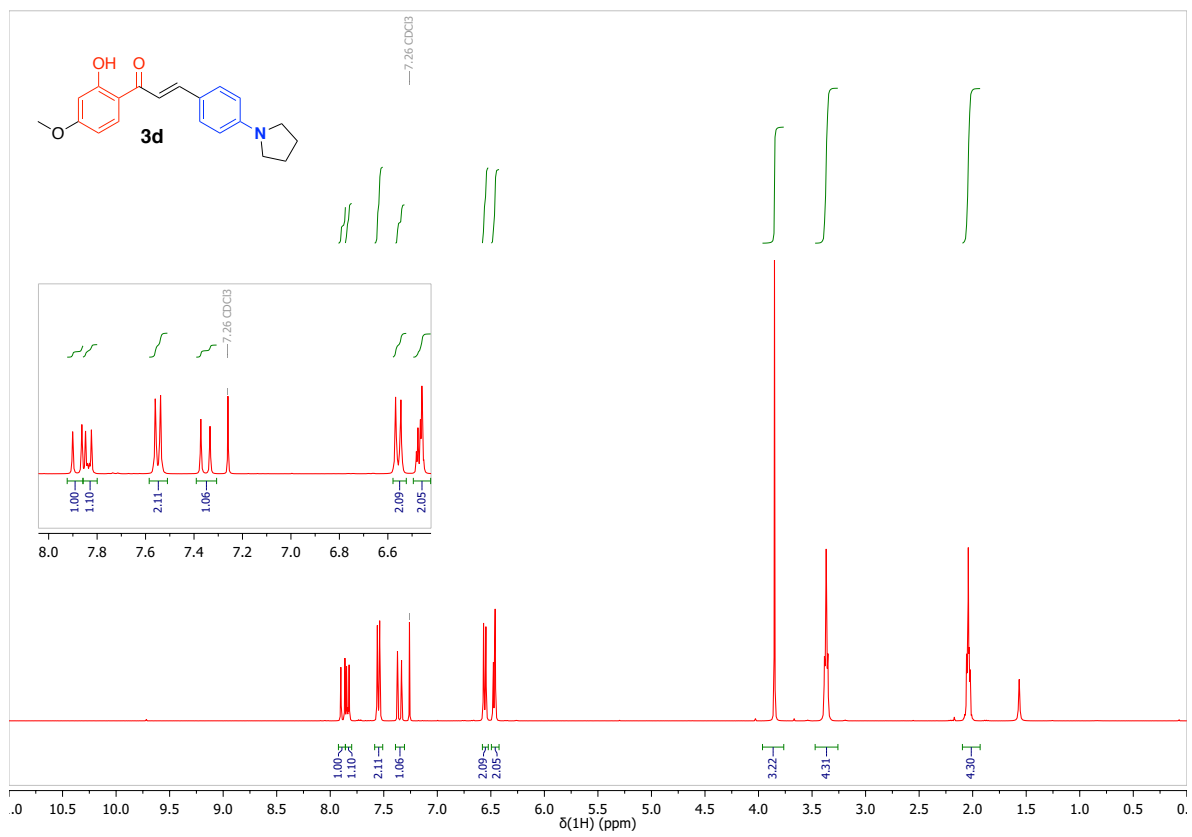

**Fig. SI 51.**  $^1\text{H}$  NMR spectrum of **3d** (400 MHz,  $\text{CDCl}_3$ ).

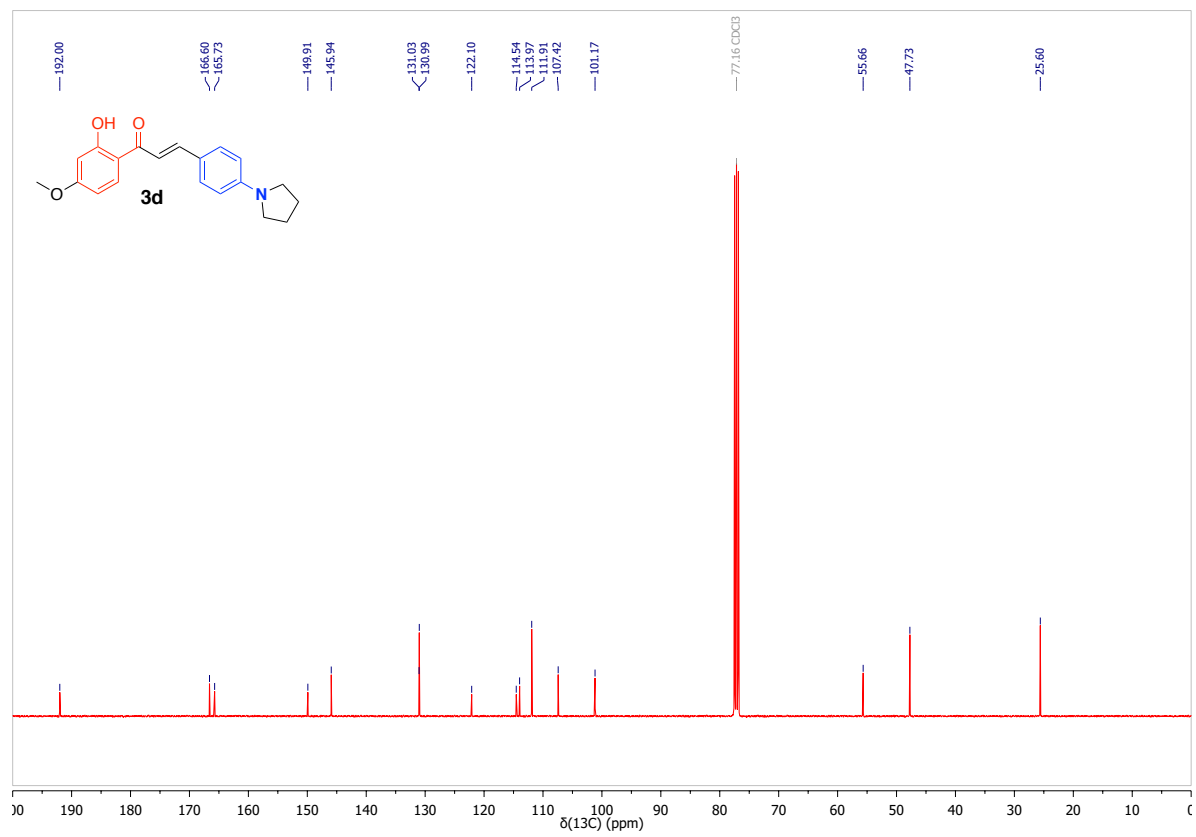

**Fig. SI 52.**  $^{13}\text{C}$  NMR spectrum of **3d** (101 MHz,  $\text{CDCl}_3$ ).

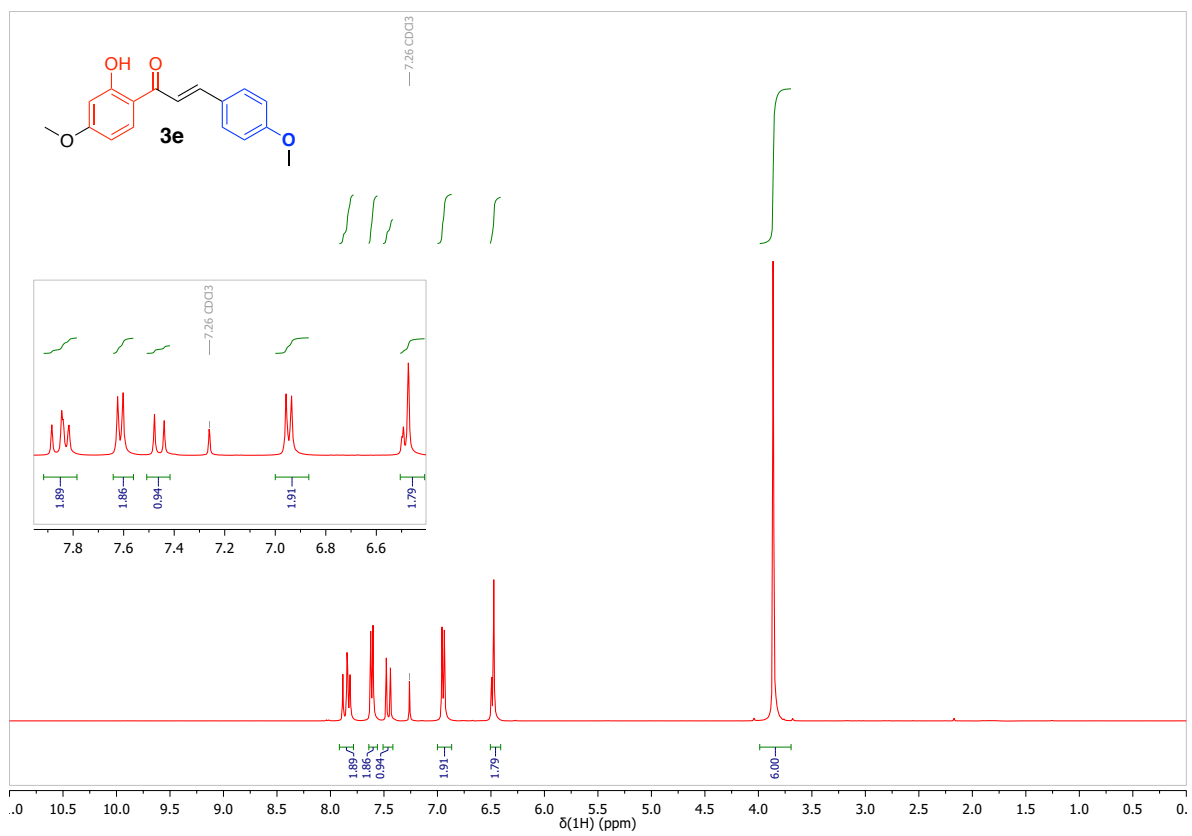

**Fig. SI 53.**  $^1\text{H}$  NMR spectrum of **3e** (400 MHz,  $\text{CDCl}_3$ ).

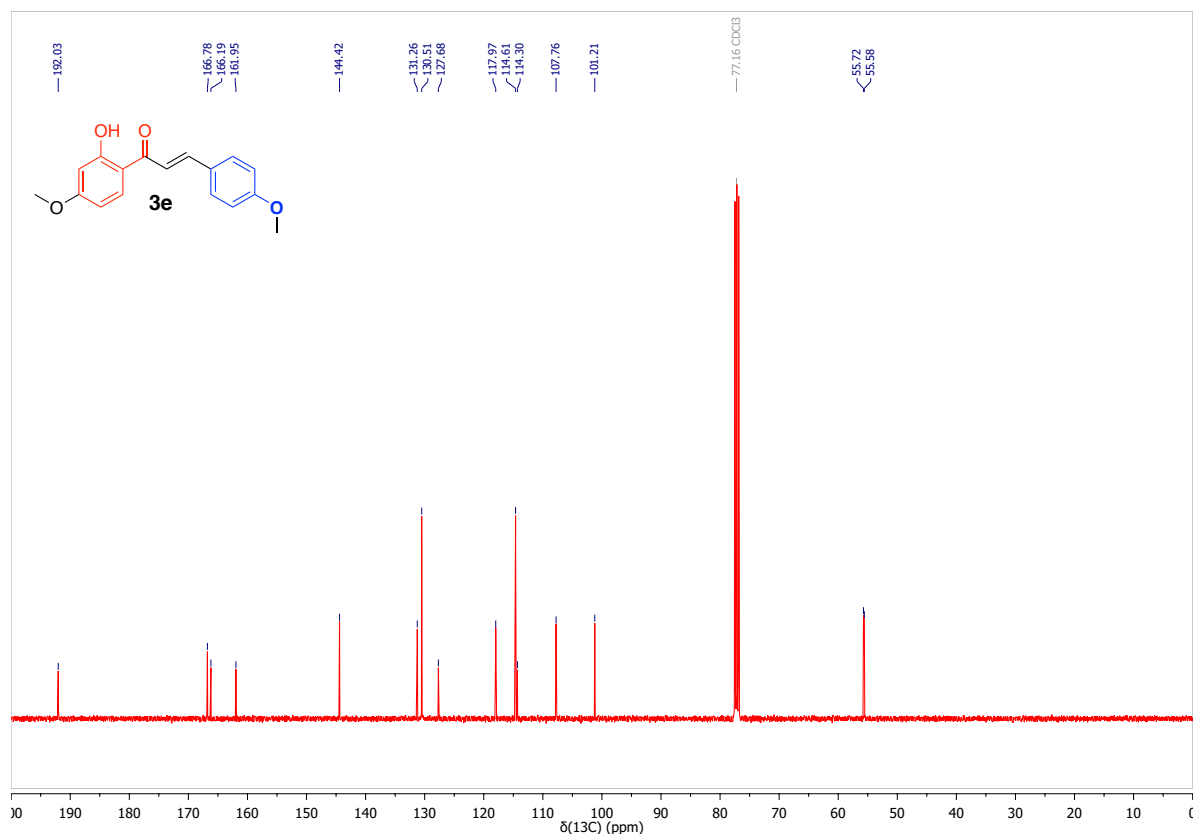

Fig. SI 54.  $^{13}\text{C}$  NMR spectrum of **3e** (101 MHz,  $\text{CDCl}_3$ ).

## 5. References

- (1) de Mello, J. C.; Wittmann, H. F.; Friend, R. H. An Improved Experimental Determination of External Photoluminescence Quantum Efficiency. *Adv. Mater.* 1997. <https://doi.org/10.1002/adma.19970090308>.
- (2) Porrès, L.; Holland, A.; Pålsson, L.-O.; Monkman, A. P.; Kemp, C.; Beeby, A. Absolute Measurements of Photoluminescence Quantum Yields of Solutions Using an Integrating Sphere. *J. Fluoresc.* 2006, *16* (2), 267–272. <https://doi.org/10.1007/s10895-005-0054-8>.
- (3) Rigaku Oxford Diffraction, (2019), *CrysAlisPro Software System, Version 1.171.40.67a*, Rigaku Corporation, Oxford, UK.
- (4) Clark, R. C.; Reid, J. S. The Analytical Calculation of Absorption in Multifaceted Crystals. *Acta. Cryst. A* 1995, *51* (6), 887–897. <https://doi.org/10.1107/S0108767395007367>.
- (5) Sheldrick, G. M. Crystal Structure Refinement with SHELXL. *Acta. Cryst. C* 2015, *71* (1), 3–8. <https://doi.org/10.1107/S2053229614024218>.
- (6) Dolomanov, O. V.; Bourhis, L. J.; Gildea, R. J.; Howard, J. a. K.; Puschmann, H. OLEX2: A Complete Structure Solution, Refinement and Analysis Program. *J. Appl. Crystallogr.* 2009, *42* (2), 339–341. <https://doi.org/10.1107/S0021889808042726>.
- (7) Sheldrick, G. M. SHELXT – Integrated Space-Group and Crystal-Structure Determination. *Acta. Cryst. A* 2015, *71* (1), 3–8. <https://doi.org/10.1107/S2053273314026370>.
